# Supplementary material for: Modulation of helix stability of indolocarbazole–pyridine hybrid foldamers
Source: Royal Society of Chemistry journal article supplement (doi:10.1039/c6cc00045b), 2016-01-01
Supplement: c6cc00045b1.pdf [file c6cc00045b1.pdf]

## Electronic Supplementary Information

### **Modulation of helix stability of indolocarbazole–pyridine hybrid foldamers**

Jee Seon Kim, Hae-Geun Jeon and Kyu-Sung Jeong\*

*\*Department of Chemistry, Yonsei University, Seoul, 120-749, Korea*

*Fax: +82-2-364-7050*

*Tel: +82-2123-2643*

*E-mail: [ksjeong@yonsei.ac.kr](mailto:ksjeong@yonsei.ac.kr)*

#### Contents

1. Syntheses and spectroscopic properties of new compounds
2. <sup>1</sup>H NMR studies
  - 2.1 Solvent-dependent <sup>1</sup>H NMR spectra
  - 2.2 Temperature-dependent <sup>1</sup>H NMR spectra
  - 2.3 2D-EXSY NMR spectra
  - 2.4 Activation free energies ( $\Delta G^\ddagger$ )
3. Computer modeling studies

## 1. Syntheses and spectroscopic properties of new compounds

1.1 General: All chemicals were purchased from commercial suppliers and used without further purification unless otherwise specified. Dichloromethane ( $\text{CH}_2\text{Cl}_2$ ) was purified by drying over calcium hydride ( $\text{CaH}_2$ ), followed by distillation. Hexane, ethyl acetate (EtOAc), and acetone were distilled. Water-saturated  $\text{CD}_2\text{Cl}_2$ , toluene- $d_6$  and chlorobenzene- $d_5$  were prepared by sonication of a mixture of solvent containing a few drops of distilled water for 30 min. After 1 h standing, organic layer was carefully separated out for use. Thin layer chromatography (TLC) was performed on Merck (silica gel 60, F-254, 0.25 mm). Silica gel 60 (230-400 mesh, Merck) was used for column chromatography. Melting points were determined with a Barnstead Electrothermal (IA9100) apparatus. 1D and 2D NMR spectra were measured by using Bruker DRX 400, Avance II instruments. Chemical shifts were reported using residual protonated solvent peaks (for  $^1\text{H}$  NMR spectra, acetone- $d_6$  2.05 ppm;  $\text{CD}_2\text{Cl}_2$  5.32 ppm; chlorobenzene- $d_5$  7.14 ppm, DMSO- $d_6$  2.50 ppm; toluene- $d_8$  7.09 ppm and for  $^{13}\text{C}$  NMR spectra, acetone- $d_6$  206.26 ppm;  $\text{CD}_2\text{Cl}_2$  53.84 ppm). FT-IR spectra were measured by using a Vertex70 FT-IR spectrometer. MALDI-TOF mass spectrometric measurements were performed on a Bruker (LRF20). The ESI-HRMS spectrometric measurements were obtained from *the Organic Chemistry Research Center at Sogang University*.

### 1.2 Synthesis of compound 2

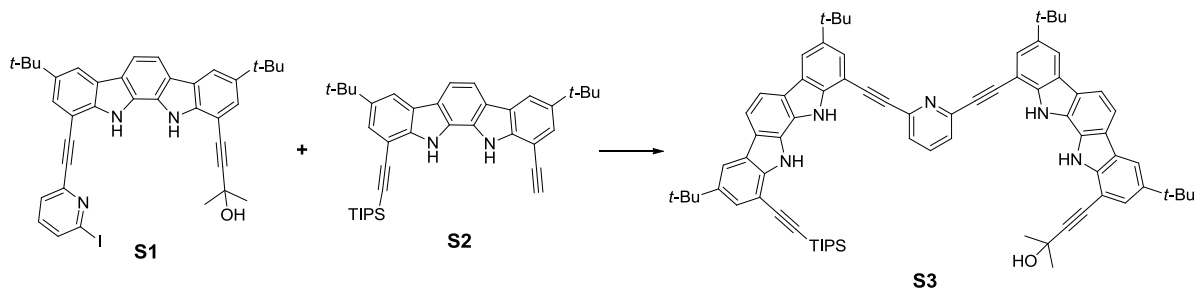

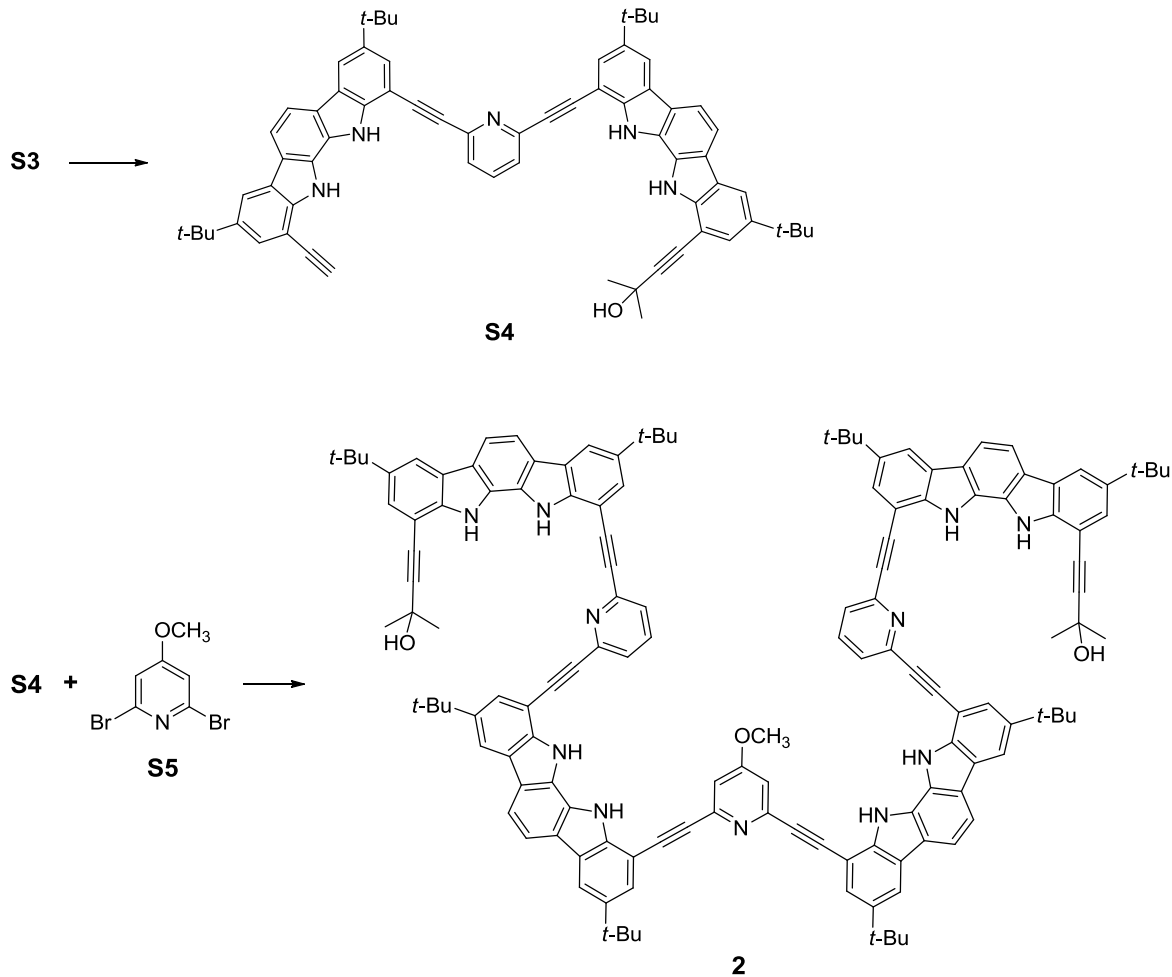

**S3**: The synthesis of **S1** and **S2** was described previously.<sup>[S1]</sup> A Schlenk flask containing compound **S1** (90 mg, 0.16 mmol), **S2** (107 mg, 1.0 eq), CuI (3.0 mg, 0.1 eq) and Pd(PPh<sub>3</sub>)<sub>2</sub>Cl<sub>2</sub> (11.0 mg, 0.1 eq) was evacuated under vacuum and back-filled with nitrogen. Anhydrous, degassed tetrahydrofuran (THF) (1.0 mL) and trimethylamine (Et<sub>3</sub>N) (1.0 mL) were added in order and the solution was stirred at 55 °C for 4 h. The mixture was filtered through Celite and concentrated, and the residue was dissolved in CH<sub>2</sub>Cl<sub>2</sub>. The organic solution was washed with brine and saturated NaHCO<sub>3</sub> solution, dried over anhydrous Na<sub>2</sub>SO<sub>4</sub> and concentrated. The residue was purified by flash column chromatography (silica gel, CH<sub>2</sub>Cl<sub>2</sub>/hexane = 3:1 (v/v)) to give **S3** as a yellow solid (129 mg, 73%); Mp > 274 °C (dec); <sup>1</sup>H NMR (400 MHz, acetone-*d*<sub>6</sub>, 298 K, ppm) δ 10.59 (s, 1H, NH), 10.52 (s, 1H, NH),

<sup>[S1]</sup> H.-G. Jeon, J. Y. Jung, P. Kang, M.-G. Choi and K.-S. Jeong, *J. Am. Chem. Soc.*, 2016, **138**, 92.

10.24 (s, 2H, NH), 8.44 (d,  $J = 1.5$  Hz, 1H), 8.43 (d,  $J = 1.5$  Hz, 1H), 8.34 (d,  $J = 1.7$  Hz, 1H), 8.28 (d,  $J = 1.7$  Hz, 1H), 7.91 (d,  $J = 7.7$  Hz, 1H), 7.87 (d,  $J = 8.1$  Hz, 1H), 7.83 (t,  $J = 1.7$  Hz, 1H), 7.64 (d,  $J = 1.8$  Hz, 1H), 7.53 (d,  $J = 1.8$  Hz, 1H), 4.50 (s, 1H), 1.54 (s, 18H, *t*-Bu), 1.54 (s, 6H), 1.47 (s, 18H, *t*-Bu), 1.06 (s, 3H), 1.05 (s, 18H);  $^{13}\text{C}$  NMR (400 MHz, acetone- $d_6$ , 298 K, ppm)  $\delta$  144.8, 143.6, 143.5, 143.4, 143.3, 139.5, 139.4, 139.0, 138.9, 138.1, 127.9, 127.7, 127.1, 127.0, 126.9, 126.9, 126.7, 125.6, 125.6, 125.5, 125.4, 125.4, 125.0, 125.0, 122.7, 122.7, 122.6, 122.4, 119.4, 119.2, 118.5, 117.6, 113.4, 113.2, 106.4, 106.3, 105.2, 104.7, 104.7, 94.8, 93.2, 92.8, 78.5, 65.4, 65.3, 35.4, 35.4, 35.2, 35.2, 32.3, 32.2, 32.2, 32.1, 19.0, 12.0; MALDI-TOF  $m/z$  calcd for  $\text{C}_{77}\text{H}_{83}\text{N}_5\text{OSi}$   $[\text{M}+\text{H}]^+$  1122, found 1122; IR (NaCl)  $\nu$  3564 (OH), 3396 (NH), 2198 ( $\text{C}\equiv\text{C}$ ), 1252 (Si- $\text{CH}_3$ ), 1157 (C-O)  $\text{cm}^{-1}$ .

**S4:** **S3** (150 mg, 0.13 mmol) was dissolved in THF (1.34 mL). To the solution tetrabutylammonium fluoride (TBAF) (0.29 mL, 1.0 M solution in THF, 2.2 eq) was added at 0 °C, and the solution was stirred for 45 min at room temperature. After concentration, the residue was purified by flash column chromatography (silica gel, hexane/EtOAc = 3:1 (v/v)) to give **S4** as a yellow solid (128 mg, 98%); Mp >224 °C (dec);  $^1\text{H}$  NMR (400 MHz, acetone- $d_6$ , 298 K, ppm)  $\delta$  10.79 (s, 1H, NH), 10.66 (s, 1H, NH), 10.31 (s, 1H, NH), 10.27 (s, 1H, NH), 4.53 (s, 1H, OH), 3.96 (s, 1H), 1.54 (s, 6H), 1.53 (s, 18H), 1.46 (s, 18);  $^{13}\text{C}$  NMR (400 MHz, acetone- $d_6$ , 298 K, ppm)  $\delta$  145.2, 145.1, 143.9, 143.7, 140.0, 139.8, 139.5, 138.6, 128.1, 127.5, 127.4, 127.4, 127.3, 126.9, 125.9, 125.8, 125.5, 125.3, 123.1, 122.9, 122.8, 122.7, 119.7, 119.7, 118.8, 118.0, 113.7, 113.6, 113.5, 106.7, 105.5, 105.1, 93.4, 88.0, 87.9, 83.4, 81.8, 78.8, 65.8, 35.8, 35.6, 33.0, 32.7, 32.6, 32.6, 32.6, 32.5, 23.7, 14.7; MALDI-TOF  $m/z$  calcd for  $\text{C}_{68}\text{H}_{63}\text{N}_5\text{O}$  966, found 966; IR (NaCl)  $\nu$  3564 (OH), 3406 (NH), 3309 (C(sp)-H), 2206 ( $\text{C}\equiv\text{C}$ ), 1160 (C-O)  $\text{cm}^{-1}$ .

**2:** **S5** was prepared according to literature procedures.<sup>[S2]</sup> A Schlenk flask containing **S4** (120 mg, 0.124 mmol, 2.5 eq), **S5** (13.3 mg, 1.0 eq), CuI (1.0 mg, 0.1 eq) and  $\text{Pd}(\text{PPh}_3)_2\text{Cl}_2$  (3.5 mg, 0.1 eq) was evacuated under vacuum and back-filled with nitrogen. Anhydrous,

---

<sup>[S2]</sup> U. Neumann, F. Vögtle, *Chem. Ber.*, 1989, **122**, 589.

degassed THF (0.5 mL) and Et<sub>3</sub>N (0.5 mL) were added in order and the solution was stirred at room temperature for 4 h 20 min. The mixture was filtered through Celite and concentrated, and the residue was dissolved in CH<sub>2</sub>Cl<sub>2</sub>. The organic solution was washed with brine and saturated NaHCO<sub>3</sub> solution, dried over anhydrous Na<sub>2</sub>SO<sub>4</sub> and concentrated. The residue was purified by flash column chromatography (silica gel, EtOAc/hexane = 1:3 (v/v)) to give **2** as a yellow solid (66 mg, 65%); Mp >268 °C (dec); <sup>1</sup>H NMR (400 MHz, CD<sub>2</sub>Cl<sub>2</sub>, 298 K, ppm) δ 10.53 (s, 2H, NH), 10.36 (s, 2H, NH), 9.95 (s, 2H, NH), 9.59 (s, 2H, NH), 8.10 (s, 2H), 7.97 (s, 2H), 7.92 (s, 2H), 7.90 (s, 2H), 7.88 (d, *J* = 8.2 Hz, 2H), 7.76 (d, *J* = 8.1 Hz, 2H), 7.69 (d, *J* = 8.2 Hz, 2H), 7.59 (d, *J* = 8.1 Hz, 2H), 7.34 (s, 2H), 7.07 (t, *J* = 7.7 Hz, 2H), 7.03 (s, 2H), 6.94 (s, 2H), 6.87 (s, 2H), 6.50 (d, *J* = 7.6 Hz, 2H), 6.39 (d, *J* = 7.6 Hz, 2H), 4.84 (s, 2H), 3.44 (s, 3H), 1.50 (s, 18H, *t*-Bu), 1.48 (s, 18H, *t*-Bu), 1.44 (s, 18H, *t*-Bu), 1.39 (s, 18H, *t*-Bu), 0.82 (s, 2H, OH), 0.81 (s, 6H, Me), 0.54 (s, 6H, Me); <sup>13</sup>C NMR (400 MHz, CD<sub>2</sub>Cl<sub>2</sub>, 298 K, ppm) δ 142.5, 142.2, 142.1, 142.1, 141.8, 141.5, 140.2, 140.0, 139.7, 138.8, 138.8, 136.3, 126.7, 126.4, 126.3, 126.2, 125.2, 124.9, 124.7, 124.6, 124.5, 124.5, 124.2, 123.9, 123.7, 122.0, 121.8, 121.6, 121.1, 118.6, 118.1, 118.0, 116.6, 112.8, 112.7, 112.5, 112.2, 111.5, 111.4, 110.0, 109.9, 104.9, 104.6, 104.2, 104.1, 103.8, 97.3, 92.2, 92.0, 91.9, 87.1, 86.7, 78.1, 65.1, 35.0, 34.9, 34.9, 32.5, 32.3, 32.2, 32.2, 30.9, 30.1; MALDI-TOF *m/z* calcd for C<sub>142</sub>H<sub>129</sub>N<sub>11</sub>O<sub>3</sub> 2037, found 2038; ESI-HRMS *m/z* calcd for C<sub>142</sub>H<sub>130</sub>N<sub>11</sub>O<sub>3</sub> [M+H]<sup>+</sup> 2038.0392, found [M+H]<sup>+</sup> 2038.0372; IR (NaCl) ν 3543 (OH), 3444 (NH), 2205 (C≡C), 1158 (C–O) cm<sup>-1</sup>.

### 1.3 Synthesis of compound **3**

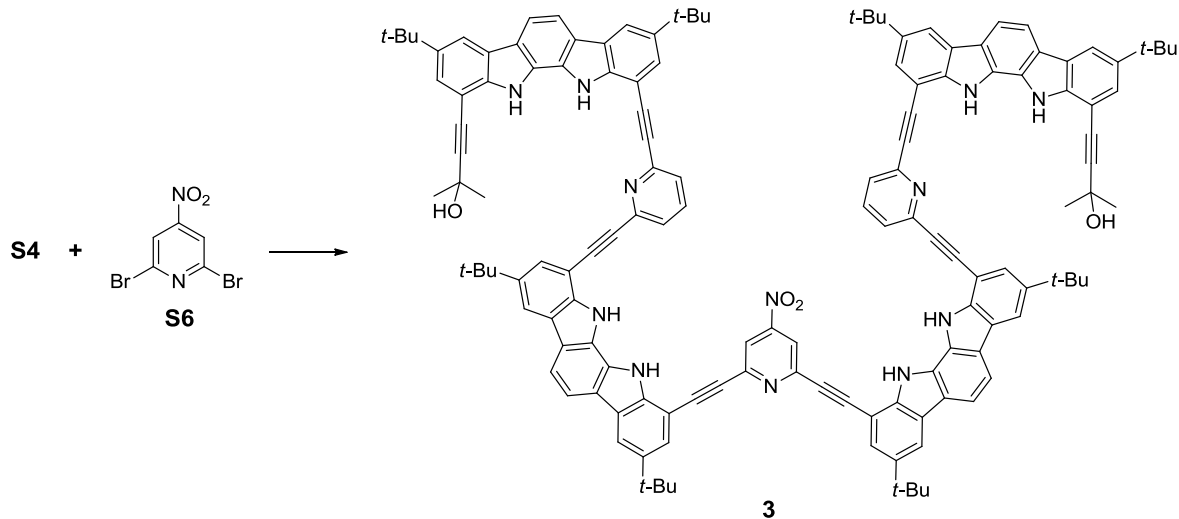

**3:** **S6** was prepared according to literature procedures.<sup>[S3]</sup> A Schlenk flask containing **S4** (49 mg, 0.05 mmol, 2.5 eq), **S6** (5.7 mg, 1.0 eq), CuI (1.2 mg, 0.3 eq) and Pd(PPh<sub>3</sub>)<sub>2</sub>Cl<sub>2</sub> (4.3 mg, 0.3 eq) was evacuated under vacuum and back-filled with nitrogen. Anhydrous, degassed THF (0.5 mL) and Et<sub>3</sub>N (0.5 mL) were added in order and the solution was stirred at room temperature for 2 h. The mixture was filtered through Celite and concentrated, and the residue was dissolved in CH<sub>2</sub>Cl<sub>2</sub>. The organic solution was washed with brine and saturated NaHCO<sub>3</sub> solution, dried over anhydrous Na<sub>2</sub>SO<sub>4</sub> and concentrated. The residue was purified by flash column chromatography (silica gel, EtOAc/hexane = 1:3 (v/v)) to give **3** as an orange solid (23 mg, 56%); Mp >272 °C (dec); <sup>1</sup>H NMR (400 MHz, CD<sub>2</sub>Cl<sub>2</sub>, 298 K, ppm) δ 10.54 (s, 2H, NH), 10.38 (s, 2H, NH), 9.95 (s, 2H, NH), 9.52 (s, 2H, NH), 8.18 (s, 2H), 8.02 (s, 2H), 8.00 (d, *J* = 8.2 Hz, 2H), 7.97 (s, 2H), 7.82 (s, 2H), 7.78 (d, *J* = 8.2 Hz, 2H), 7.62 (d, *J* = 8.2 Hz, 2H), 7.41 (s, 2H), 7.32 (d, *J* = 8.1 Hz, 2H), 7.13 (t, *J* = 7.7 Hz, 2H), 7.04 (s, 2H), 6.97 (s, 2H), 6.88 (s, 2H), 6.46 (d, *J* = 7.6 Hz, 2H), 6.38 (d, *J* = 7.6 Hz, 2H), 5.67 (s, 2H), 1.56 (s, 18H, *t*-Bu), 1.53 (s, 18H, *t*-Bu), 1.41 (s, 18H, *t*-Bu), 1.38 (s, 18H, *t*-Bu), 0.94 (s, 2H, OH), 0.82 (s, 6H, Me), 0.45 (s, 6H, Me); <sup>13</sup>C NMR (400 MHz, acetone-*d*<sub>6</sub>, 298 K, ppm) δ 144.8, 143.6, 143.4, 143.4, 143.3, 143.1, 143.0, 141.2, 140.7, 139.2, 138.4, 137.4, 128.7, 127.7, 127.6, 127.4, 127.2, 126.8, 126.2, 125.8, 125.4, 125.3, 125.0, 123.2,

<sup>[S3]</sup> (a) J. C. Rodriguez-Ubis, R. Sedano, G. Barroso, O. Juanes and E. Brunet, *Helv. Chim. Acta*, 1997, **80**, 86; (b) M. Nettekoven and C. Jenny, *Org. Proces Res. Dev.*, 2003, **7**, 38.

122.9, 122.6, 122.5, 120.5, 119.5, 119.1, 117.9, 116.6, 113.9, 113.7, 113.4, 113.0, 106.7, 105.1, 104.9, 104.4, 99.4, 93.5, 93.1, 93.1, 91.6, 91.2, 88.8, 87.8, 78.6, 65.5, 65.4, 35.8, 35.7, 33.0, 32.8, 32.7, 32.0, 23.8; MALDI-TOF  $m/z$  calcd for  $C_{141}H_{126}N_{12}O_4$  2052, found 2053; ESI-HRMS  $m/z$  calcd for  $C_{141}H_{127}N_{12}O_4$   $[M+H]^+$  2053.0137, found  $[M+H]^+$  2053.0125; IR (NaCl)  $\nu$  3542 (OH), 3444 (NH), 2207 (C≡C), 1160 (C–O), 1396, 1364 (N=O)  $cm^{-1}$ .

#### 1.4 Synthesis of compound 4

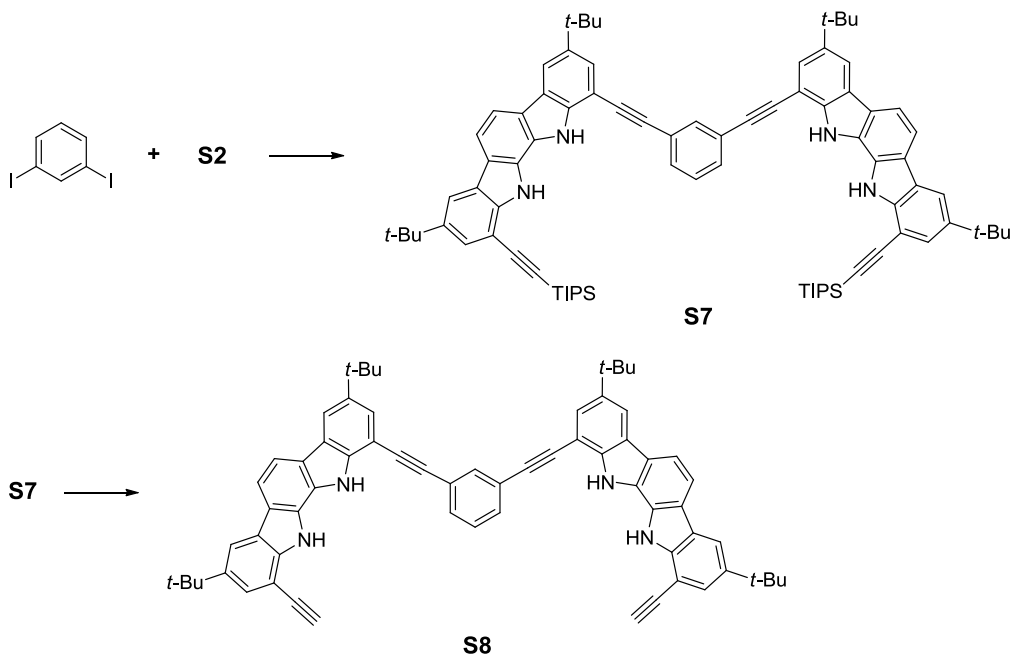

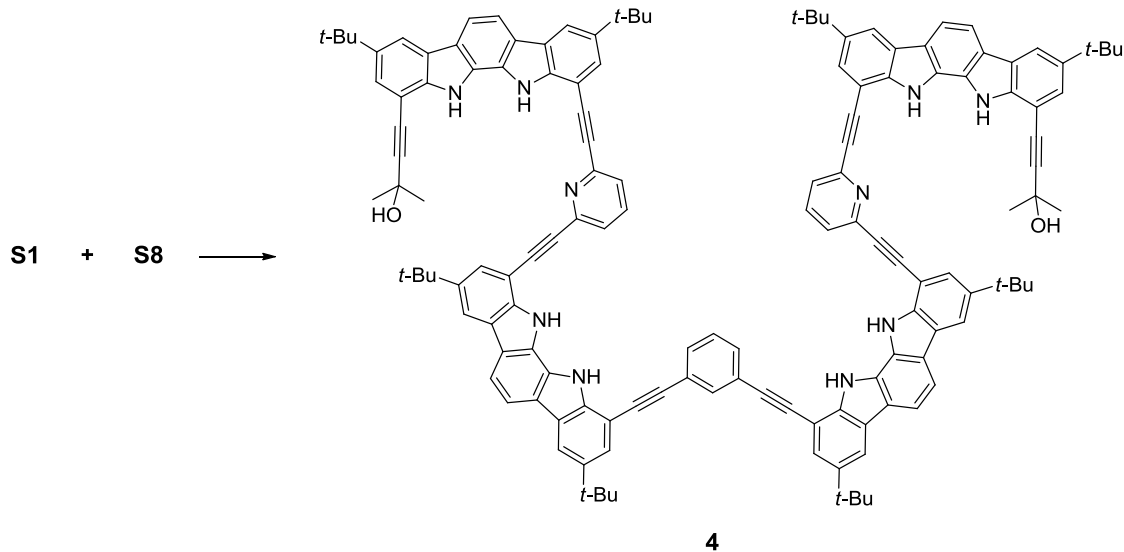

**S7:** A Schlenk flask containing 1,3-diiodobenzene (0.17 g, 0.51 mmol), **S2** (0.60 g, 1.05 mmol), CuI (1.0 mg, 0.0053 mmol) and Pd(PPh<sub>3</sub>)<sub>2</sub>Cl<sub>2</sub> (4.0 mg, 0.0057 mmol) was evacuated under vacuum and back-filled with nitrogen. Anhydrous, degassed THF (5.0 mL), Et<sub>3</sub>N (5.0 mL) were sequentially added, and the solution was stirred at 55 °C for 4 h. The mixture was filtered through Celite and concentrated. The residue was dissolved in CH<sub>2</sub>Cl<sub>2</sub>, washed with water and brine, and dried over anhydrous Na<sub>2</sub>SO<sub>4</sub>. After concentration under reduced pressure, the residue was purified by flash column chromatography (silica gel, CH<sub>2</sub>Cl<sub>2</sub>/hexane = 1:5 (v/v)) to give **S7** as a brown solid (0.43 g, 67%); Mp: 304–305 °C; <sup>1</sup>H NMR (400 MHz, acetone-*d*<sub>6</sub>, 298 K, ppm) δ 10.38 (s, 2H, NH), 10.13 (s, 2H, NH), 8.37 (d, *J* = 1.4 Hz, 2H), 8.32 (d, *J* = 1.4 Hz, 2H), 8.09 (s, 1H), 8.07 (d, *J* = 8.4 Hz, 2H), 8.04 (d, *J* = 8.4 Hz, 2H), 7.85 (dd, *J* = 7.7 Hz and 1.4 Hz, 2H), 7.76 (d, *J* = 1.6 Hz, 2H), 7.65 (t, *J* = 7.7 Hz, 1H), 7.62 (d, *J* = 1.7 Hz, 2H), 1.53 (s, 9H, *t*-Bu), 1.46 (s, 9H, *t*-Bu), 1.06 (s, 3H), 1.05 (s, 18H); <sup>13</sup>C NMR (400 MHz, acetone-*d*<sub>6</sub>, 298 K, ppm) δ 143.6, 143.5, 139.6, 139.3, 135.1, 132.7, 130.2, 127.6, 127.1, 126.5, 125.5, 125.4, 125.1, 122.8, 122.8, 118.7, 118.6, 113.5, 113.4, 106.5, 105.9, 105.2, 95.0, 93.2, 88.3, 35.5, 35.4, 32.4, 32.3, 19.1, 12.1; MALDI-TOF *m/z* calcd for C<sub>84</sub>H<sub>98</sub>N<sub>4</sub>Si<sub>2</sub> 1219, found 1218; IR (NaCl) ν 3406 (NH), 2206 (C≡C) cm<sup>-1</sup>.

**S8:** **S7** (80 mg, 0.07 mmol) was dissolved in THF (0.66 mL). To the solution TBAF (0.28



mL, 1.0 M solution in THF, 4.4 eq) was added at 0 °C, and stirred for 2 h at room temperature. After concentration, the residue was purified by flash column chromatography (silica gel, hexane/EtOAc = (v/v) 6:1) to give **S8** as an ivory solid (55 mg, 93%); Mp > 212 °C (dec); <sup>1</sup>H NMR (400 MHz, acetone-*d*<sub>6</sub>, 298 K, ppm) δ 10.66 (s, 2H, NH), 10.26 (s, 2H, NH), 8.38 (d, *J* = 1.5 Hz, 2H), 8.33 (d, *J* = 1.5 Hz, 2H), 8.07 (d, *J* = 8.4 Hz, 2H), 8.05 (d, *J* = 8.4 Hz, 2H), 7.98 (s, 1H), 7.78 (dd, *J* = 7.4 Hz and 1.5 Hz, 2H), 7.78 (d, *J* = 1.8 Hz, 2H), 7.65 (t, *J* = 7.7 Hz, 1H), 7.63 (d, *J* = 1.8 Hz, 2H), 3.99 (s, 2H), 1.52 (s, 9H, *t*-Bu), 1.46 (s, 9H, *t*-Bu); <sup>13</sup>C NMR (400 MHz, acetone-*d*<sub>6</sub>, 298 K, ppm) δ 143.5, 143.4, 139.6, 139.3, 135.1, 132.5, 130.2, 127.1, 127.1, 127.0, 126.8, 125.3, 125.2, 125.0, 122.6, 122.6, 118.7, 118.5, 113.3, 113.3, 105.7, 105.2, 92.9, 88.3, 83.2, 81.2, 35.4, 35.3, 32.3, 32.3; MALDI-TOF *m/z* calcd for C<sub>66</sub>H<sub>58</sub>N<sub>4</sub> 906, found 906; IR (NaCl) ν 3406 (NH), 3309 (C(sp)-H), 2206 (C≡C) cm<sup>-1</sup>.

**4**: A Schlenk flask containing **S8** (54 mg, 0.06 mmol), **S1** (81 mg, 2.0 eq), CuI (1.1 mg, 0.1 eq) and Pd(PPh<sub>3</sub>)<sub>2</sub>Cl<sub>2</sub> (4.2 mg, 0.1 eq) was evacuated under vacuum and back-filled with nitrogen. Anhydrous, degassed THF (0.6 mL) and Et<sub>3</sub>N (0.6 mL) were added in order and the solution was stirred at 55 °C for 4 h. The mixture was filtered through Celite and concentrated, and the residue was dissolved in CH<sub>2</sub>Cl<sub>2</sub>. The organic solution was washed with brine and saturated NaHCO<sub>3</sub> solution, dried over anhydrous Na<sub>2</sub>SO<sub>4</sub> and concentrated. The residue was purified by flash column chromatography (silica gel, hexane/EtOAc = 3:1 (v/v) and EtOAc/pentane = 1:4 (v/v)) to give **4** as a yellow solid (64 mg, 53%); Mp > 260 °C (dec); <sup>1</sup>H NMR (400 MHz, CD<sub>2</sub>Cl<sub>2</sub>, 298 K, ppm) δ 11.48 (s, 2H, NH), 9.62 (s, 2H, NH), 9.32 (s, 4H, NH), 8.30 (s, 2H), 8.01 (s, 2H), 7.98 (d, *J* = 8.0 Hz, 2H), 7.94 (s, 2H), 7.85 (d, *J* = 8.0 Hz, 2H), 7.77 (s, 2H), 7.74 (d, *J* = 8.0 Hz, 2H), 7.61 (d, *J* = 8.0 Hz, 2H), 7.43 (s, 1H), 7.26 (s, 2H), 7.25 (s, 2H), 7.07 (s, 4H), 6.64 (t, *J* = 7.7 Hz, 2H), 6.13 (d, *J* = 7.7 Hz, 2H), 6.07 (d, *J* = 7.7 Hz, 2H), 5.76 (t, *J* = 7.0 Hz, 1H), 5.42 (d, *J* = 7.6 Hz, 2H), 1.55 (s, 18H, *t*-Bu), 1.48 (s, 18H, *t*-Bu), 1.41 (s, 18H, *t*-Bu), 1.39 (s, 18H, *t*-Bu), 0.80 (s, 12H, Me), 0.77 (s, 2H, OH); <sup>13</sup>C NMR (400 MHz, acetone-*d*<sub>6</sub>, 298 K, ppm) δ 144.6, 144.5, 143.7, 143.5, 143.4, 139.5, 139.4, 139.2, 139.1, 137.7, 132.3, 129.8, 127.5, 127.5, 127.2, 127.2, 127.1, 127.1,

126.9, 126.8, 126.8, 125.6, 125.3, 125.1, 125.1, 124.7, 122.8, 122.8, 122.6, 122.4, 119.3, 119.3, 118.6, 117.7, 113.5, 113.4, 113.4, 113.3, 113.3, 106.4, 105.8, 104.9, 104.8, 99.9, 93.1, 93.1, 93.0, 92.9, 88.2, 87.5, 87.4, 78.6, 65.5, 35.5, 35.5, 35.4, 35.3, 32.4, 32.3, 32.2; MALDI-TOF  $m/z$  calcd for  $C_{142}H_{128}N_{10}O_2$  2006, found 2007; ESI-HRMS  $m/z$  calcd for  $C_{142}H_{128}N_{10}NaO_2$   $[M+Na]^+$  2029.0153, found  $[M+Na]^+$  2029.0144; IR (NaCl)  $\nu$  3406 (NH), 2205 (C $\equiv$ C), 1160 (C–O)  $cm^{-1}$ .

### 1.5 Synthesis of compound 5

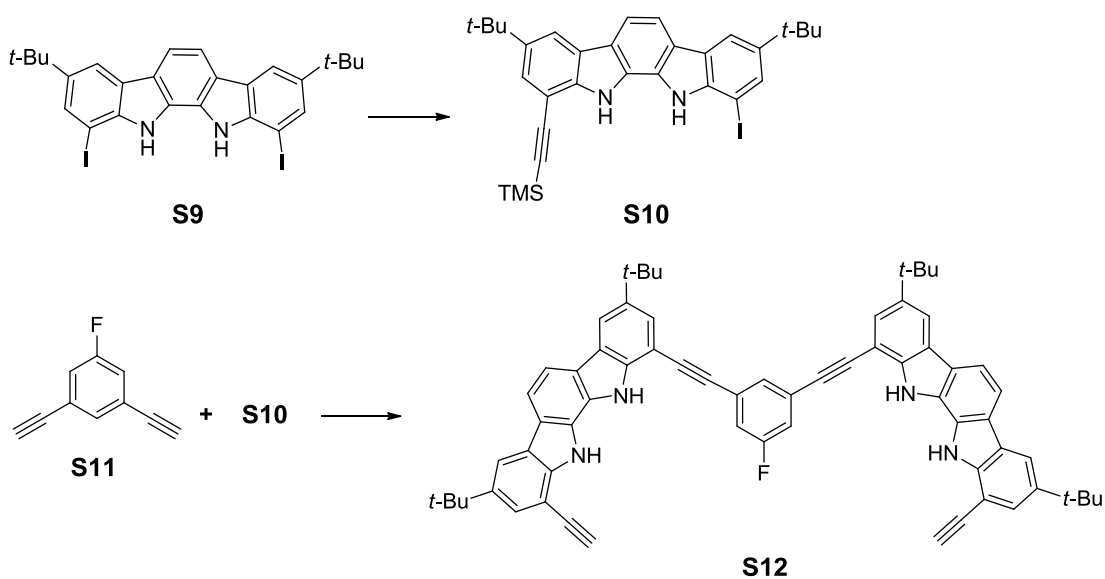

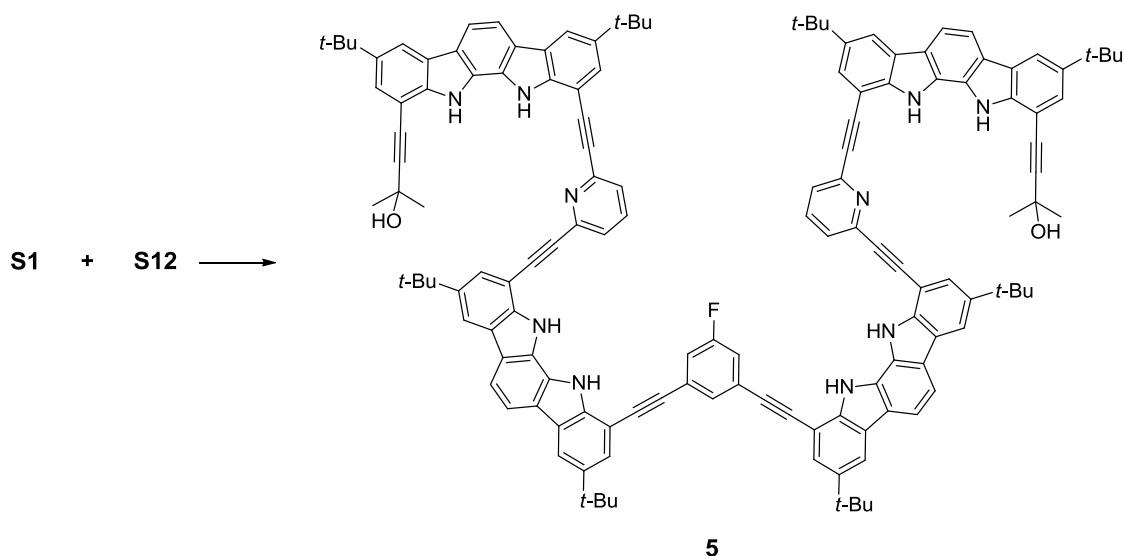

**S10:** The synthesis of **S9** was described previously.<sup>[S4]</sup> A Schlenk flask containing **S9** (1.00 g, 1.61 mmol, 1.0 eq), CuI (26 mg, 0.085 eq) and Pd(PPh<sub>3</sub>)<sub>2</sub>Cl<sub>2</sub> (29 mg, 0.026 eq) was evacuated under vacuum and back-filled with nitrogen. Anhydrous, degassed THF (28 mL), Et<sub>3</sub>N (18 mL) and distilled trimethylsilane acetylene (TMS-acetylene) (0.32 mL, 1.4 eq) were sequentially added in order and the solution was stirred at 55 °C for 13 h. The mixture was filtered through Celite and concentrated, and the residue was dissolved in CH<sub>2</sub>Cl<sub>2</sub>. The organic solution was washed with water, dried over anhydrous Na<sub>2</sub>SO<sub>4</sub> and concentrated. The residue was purified by flash column chromatography (silica gel, CH<sub>2</sub>Cl<sub>2</sub>/hexane = 1:2 (v/v)) to give **S10** as a dark green solid (290 mg, 30%); Mp 197–198 °C; <sup>1</sup>H NMR (400 MHz, acetone-*d*<sub>6</sub>, 298 K, ppm) δ 10.48 (s, 1H, NH), 9.85 (s, 1H, NH), 8.32 (d, *J* = 1.7 Hz, 1H), 8.28 (d, *J* = 1.4 Hz, 1H), 8.03 (d, *J* = 8.3 Hz, 1H), 7.99 (d, *J* = 8.4 Hz, 1H), 7.87 (d, *J* = 1.6 Hz, 1H), 7.63 (d, *J* = 1.8 Hz, 1H), 1.47 (s, 9H, *t*-Bu), 1.46 (s, 9H, *t*-Bu), 0.34 (s, 9H); <sup>13</sup>C NMR (400 MHz, acetone-*d*<sub>6</sub>, 298 K, ppm) δ 145.7, 143.5, 140.5, 139.3, 132.4, 127.5, 127.1, 126.7, 125.6, 125.4, 123.2, 122.7, 118.6, 117.4, 113.6, 113.6, 106.2, 103.3, 98.6, 76.5, 35.4, 35.4, 32.4, 32.4, 0.4; MALDI-TOF *m/z* calcd for C<sub>32</sub>H<sub>35</sub>IN<sub>2</sub>Si 590, found 590; IR (NaCl) ν 3390 (NH), 2128 (C≡C), 1250 (Si-CH<sub>3</sub>) cm<sup>-1</sup>.

<sup>[S4]</sup> (a) K.-J. Chang, D. Moon, M. S. Lah and K.-S. Jeong, *Angew. Chem. Int. Ed.*, 2005, **44**, 7926; (b) N.-K. Kim, K.-J. Chang, D. Moon, M. S. Lah and K.-S. Jeong, *Chem. Commun.*, 2007, 3401.

**S12:** **S11** was prepared according to literature procedures.<sup>[S5]</sup> A Schlenk flask containing **S11** (17 mg, 0.118 mmol, 1.0 eq), **S10** (144 mg, 2.1 eq), CuI (2 mg, 0.09 eq) and Pd(PPh<sub>3</sub>)<sub>2</sub>Cl<sub>2</sub> (6 mg, 0.07 eq) was evacuated under vacuum and back-filled with nitrogen. Anhydrous, degassed THF (1.0 mL) and Et<sub>3</sub>N (1.5 mL) were added in order and the solution was stirred at 55 °C for 3.5 h. The mixture was filtered through Celite and concentrated, and the residue was dissolved in CH<sub>2</sub>Cl<sub>2</sub>. The organic solution was washed with water, dried over anhydrous Na<sub>2</sub>SO<sub>4</sub> and concentrated. The crude mixture dissolved in THF (16 mL). To the solution TBAF (0.73 mL, 1.0 M solution in THF, 6.2 eq) was added, and stirred for 5 min at room temperature. After concentration, the residue was purified by flash column chromatography (silica gel, CH<sub>2</sub>Cl<sub>2</sub>/hexane = 1:1 (v/v)) to give **S12** as an ivory solid (68 mg, 60%); Mp >235 °C (dec); <sup>1</sup>H NMR (400 MHz, acetone-*d*<sub>6</sub>, 298 K, ppm) δ 10.66 (s, 2H, NH), 10.24 (s, 2H, NH), 8.39 (d, *J*= 1.2 Hz, 2H), 8.32 (d, *J*= 1.2 Hz, 2H), 8.06 (d, *J*= 8.4 Hz, 2H), 8.04 (d, *J*= 8.4 Hz, 2H), 7.82 (s, 1H), 7.79 (d, *J*= 1.6 Hz, 2H), 7.63 (d, *J*= 1.5 Hz, 2H), 7.57 (d, *J*= 8.5 Hz, 2H), 3.97 (s, 2H), 1.51 (s, 18H, *t*-Bu), 1.50 (s, 18H, *t*-Bu); <sup>13</sup>C NMR (400 MHz, acetone-*d*<sub>6</sub>, 298 K, ppm) δ 143.7, 143.5, 139.8, 139.5, 131.6, 127.2, 127.1, 127.1, 127.0, 125.6, 125.3, 122.8, 122.6, 119.4, 119.2, 119.1, 118.6, 113.5, 113.4, 105.3, 105.3, 91.9, 89.6, 83.2, 81.7, 55.1, 35.4, 35.4, 32.5, 32.4; MALDI-TOF *m/z* calcd for C<sub>66</sub>H<sub>57</sub>FN<sub>4</sub> 924, found 925; IR (NaCl) ν 3418 (NH), 3311 (C(sp)-H), 2208 (C≡C) cm<sup>-1</sup>.

**5:** A Schlenk flask containing **S1** (86 mg, 0.127 mmol, 2.0 eq), **S12** (59 mg, 1.0 eq), CuI (1 mg, 0.08 eq) and Pd(PPh<sub>3</sub>)<sub>2</sub>Cl<sub>2</sub> (4 mg, 0.09 eq) was evacuated under vacuum and back-filled with nitrogen. Anhydrous, degassed THF (1.0 mL) and Et<sub>3</sub>N (1.6 mL) were added in order and the solution was stirred at 55 °C for 2.5 h. The mixture was filtered through Celite and concentrated, and the residue was dissolved in CH<sub>2</sub>Cl<sub>2</sub>. The organic solution was washed with water, dried over anhydrous Na<sub>2</sub>SO<sub>4</sub> and concentrated. The residue was

---

<sup>[S5]</sup> J. Dash, R. Nath Das, N. Hegde, G. D. Pantoş, P. S. Shirude and S. Balasubramanian, *Chem. Eur. J.*, 2012, **18**, 554.

purified by flash column chromatography (silica gel, EtOAc/hexane = 1:4 (v/v)) to give **5** as a yellow solid (80 mg, 62%); Mp >261 °C (dec); <sup>1</sup>H NMR (400 MHz, CD<sub>2</sub>Cl<sub>2</sub>, 298 K, ppm) δ 11.49 (s, 2H, NH), 9.59 (s, 2H, NH), 9.29 (s, 2H, NH), 9.26 (s, 2H, NH), 8.32 (d, *J*= 1.6 Hz, 2H), 8.05 (d, *J*= 1.6 Hz, 2H), 8.02 (s, 1H), 8.00 (s, 2H), 7.96 (d, *J*= 1.6 Hz, 2H), 7.87 (d, *J*= 8.2 Hz, 2H), 7.64 (d, *J*= 8.2 Hz, 2H), 7.25 (d, *J*= 1.6 Hz, 2H), 7.21 (d, *J*= 1.8 Hz, 2H), 7.16 (s, 1H), 7.03 (d, *J*= 1.7 Hz, 2H), 6.98 (d, *J*= 1.3 Hz, 2H), 6.63 (t, *J*= 7.7 Hz, 2H), 6.10 (dd, *J*= 7.7 Hz and 0.8 Hz, 2H), 6.01 (dd, *J*= 7.7 Hz and 0.8 Hz, 2H), 4.95 (d, *J*= 9.3 Hz, 2H), 1.55 (s, 18H, *t*-Bu), 1.47 (s, 18H, *t*-Bu), 1.41 (s, 18H, *t*-Bu), 1.40 (s, 18H, *t*-Bu), 0.79 (s, 12H, Me), 0.63 (s, 2H, OH); <sup>13</sup>C NMR (400 MHz, CD<sub>2</sub>Cl<sub>2</sub>, 298 K, ppm) δ 143.2, 142.9, 142.6, 142.3, 141.9, 141.6, 141.0, 139.0, 138.7, 138.4, 138.1, 136.0, 129.2, 129.0, 128.8, 128.3, 128.1, 127.9, 126.7, 126.5, 126.3, 125.8, 125.6, 125.4, 125.2, 124.9, 124.5, 124.3, 123.9, 122.0, 121.9, 121.9, 121.9, 118.9, 118.3, 117.1, 116.9, 115.6, 112.9, 112.5, 111.8, 106.1, 104.7, 104.7, 103.9, 96.6, 92.8, 92.8, 92.5, 91.4, 89.2, 87.9, 86.5, 78.6, 65.6, 35.3, 35.1, 35.0, 34.9, 32.5, 32.5, 32.3, 32.3, 30.6; MALDI-TOF *m/z* calcd for C<sub>142</sub>H<sub>127</sub>FN<sub>10</sub>O<sub>2</sub> 2025, found 2024; ESI-HRMS *m/z* calcd for C<sub>142</sub>H<sub>128</sub>FN<sub>10</sub>O<sub>2</sub> [M+H]<sup>+</sup> 2025.0239, found [M+H]<sup>+</sup> 2025.0237; IR (NaCl) ν 3443 (NH), 2205 (C≡C), 1161 (C–O) cm<sup>-1</sup>.

### 1.6 Synthesis of compound **6**

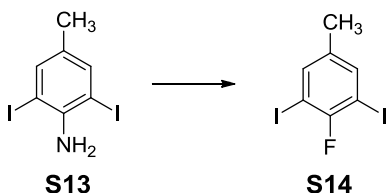

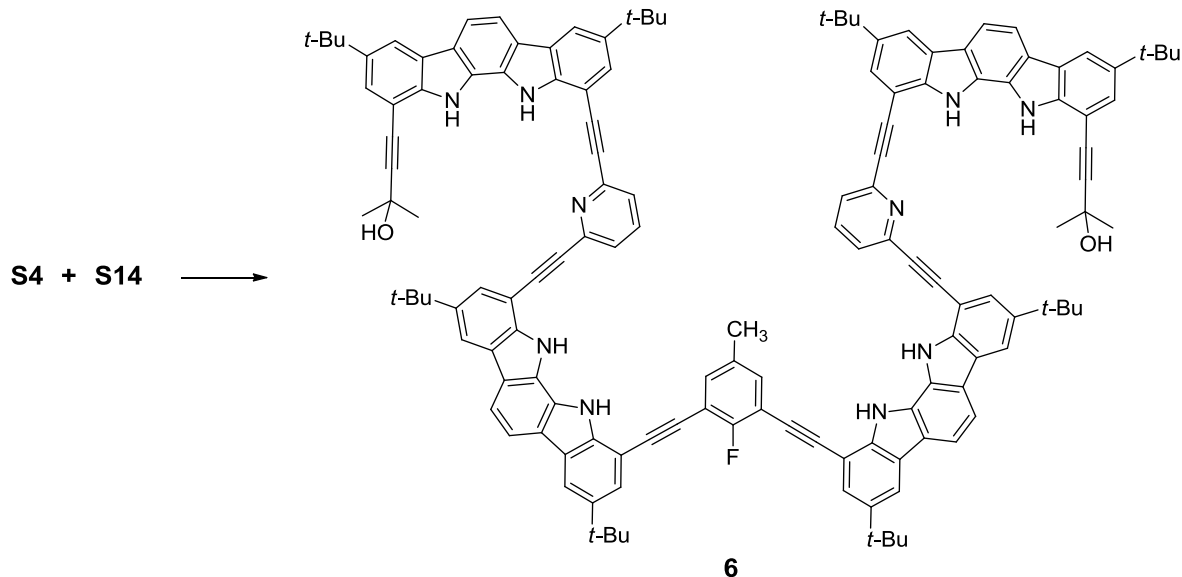

**S14:** **S13** was prepared according to literature procedures.<sup>[S6]</sup> To a solution of 48% HBF<sub>4</sub> (2.9 mL) at 0 °C was added dropwise NaNO<sub>2</sub> (377 mg). A solution of **S13** (280 mg) and THF (0.7 mL) was then added and the resultant yellow suspension stirred at 0 °C for 30 min. The yellow solid was filtered and washed with cold water. The solid was dried in vacuum and 305 mg of the diazonium salt was gained. The solid was then heated to 120 °C under nitrogen for 1.5 h. The yellow solid changed into dark brown liquid. The residue was dissolved in CH<sub>2</sub>Cl<sub>2</sub> and washed with water, dried over anhydrous Na<sub>2</sub>SO<sub>4</sub> and concentrated. The residue was purified by flash column chromatography (silica gel, CH<sub>2</sub>Cl<sub>2</sub>/hexane = 1:2 (v/v)) to give **S14** as a yellow solid (168 mg, 60%); Mp 59–60 °C; <sup>1</sup>H NMR (400 MHz, acetone-*d*<sub>6</sub>, 298 K, ppm) δ 7.685 (d, *J* = 4.0 Hz, 2H), 2.3 (s, 3H); <sup>13</sup>C NMR (400 MHz, acetone-*d*<sub>6</sub>, 298 K, ppm) δ 141.1, 140.7, 139.1, 80.7, 19.7; GC-MS *m/z* calcd for C<sub>7</sub>H<sub>5</sub>FI<sub>2</sub> 362, found 362; IR (NaCl) ν 2921, 1509, 1380, 1247, 1037, 851, 757, 710, 691, 552.

**6:** A Schlenk flask containing **S4** (81 mg, 0.084 mmol, 2.5 eq), **S14** (12.1 mg, 1.0 eq), CuI

<sup>[S6]</sup> (a) S. B. Junne, A. Y. Vibhute, Y. B. Vibhute and V. M. Gurav, *Int. J. ChemTech Res.*, 2009, **1**, 1005; (b) Korner Contrach-ATTI Lines, 1913, **22**, 824.

(0.6 mg, 0.1 eq) and Pd(PPh<sub>3</sub>)<sub>2</sub>Cl<sub>2</sub> (2.3 mg, 0.1 eq) was evacuated under vacuum and back-filled with nitrogen. Anhydrous, degassed THF (0.3 mL) and Et<sub>3</sub>N (0.3 mL) were added in order and the solution was stirred at room temperature for 6 h. The mixture was filtered through Celite and concentrated, and the residue was dissolved in CH<sub>2</sub>Cl<sub>2</sub>. The organic solution was washed with brine and saturated NaHCO<sub>3</sub> solution, dried over anhydrous Na<sub>2</sub>SO<sub>4</sub> and concentrated. The residue was purified by flash column chromatography (silica gel, EtOAc/pentane = 1:5 (v/v)) to give **6** as a yellow solid (52 mg, 77%); Mp >284 °C (dec); <sup>1</sup>H NMR (400 MHz, CD<sub>2</sub>Cl<sub>2</sub>, 298 K, ppm) δ 9.90 (s, 2H, NH), 9.59 (s, 2H, NH), 9.14 (s, 2H, NH), 8.32 (s, 2H, NH), 8.08 (s, 2H), 8.01 (d, *J* = 8.0 Hz, 2H), 7.97 (s, 2H), 7.90 (d, *J* = 8.0 Hz, 2H), 7.79 (d, *J* = 8.0 Hz, 2H), 7.70 (s, 2H), 7.57 (d, *J* = 8.0 Hz, 2H), 7.33 (s, 1H), 7.20 (s, 2H), 7.05 (s, 2H), 6.95 (s, 4H), 6.68 (t, *J* = 7.9 Hz, 2H), 6.13 (d, *J* = 8.2 Hz, 2H), 6.11 (d, *J* = 8.0 Hz, 2H), 5.08 (d, *J* = 6.7 Hz, 2H), 1.76 (s, 3H), 1.58 (s, 18H, *t*-Bu), 1.44 (s, 18H, *t*-Bu), 1.41 (s, 18H, *t*-Bu), 1.38 (s, 18H, *t*-Bu), 0.78 (s, 12H, Me), 0.60 (s, 2H, OH); <sup>13</sup>C NMR (400 MHz, CD<sub>2</sub>Cl<sub>2</sub>, 298 K, ppm) δ 143.1, 142.3, 142.2, 141.7, 140.1, 138.8, 138.8, 136.1, 131.5, 131.5, 127.3, 127.3, 126.9, 126.5, 126.4, 126.2, 125.7, 125.7, 125.4, 125.1, 125.1, 124.8, 124.5, 124.3, 124.2, 123.9, 123.7, 122.2, 122.2, 122.1, 118.8, 117.9, 117.2, 116.7, 112.8, 112.6, 112.6, 111.8, 111.4, 105.7, 105.0, 104.9, 104.5, 104.4, 99.9, 97.4, 91.9, 91.3, 88.7, 86.9, 78.5, 65.5, 65.2, 64.7, 35.3, 35.1, 35.0, 34.9, 34.9, 32.5, 32.5, 32.4, 32.3, 30.8; MALDI-TOF *m/z* calcd for C<sub>143</sub>H<sub>130</sub>FN<sub>10</sub>O<sub>2</sub> [M+H]<sup>+</sup> 2039, found 2039; ESI-HRMS *m/z* calcd for C<sub>143</sub>H<sub>129</sub>FN<sub>10</sub>NaO<sub>2</sub> [M+Na]<sup>+</sup> 2061.0215, found [M+Na]<sup>+</sup> 2061.0204; IR (NaCl) ν 2240 (C≡C), 1161 (C–O) cm<sup>-1</sup>.

## 2. $^1\text{H}$ NMR studies

### 2.1 Solvent-dependent $^1\text{H}$ NMR spectra

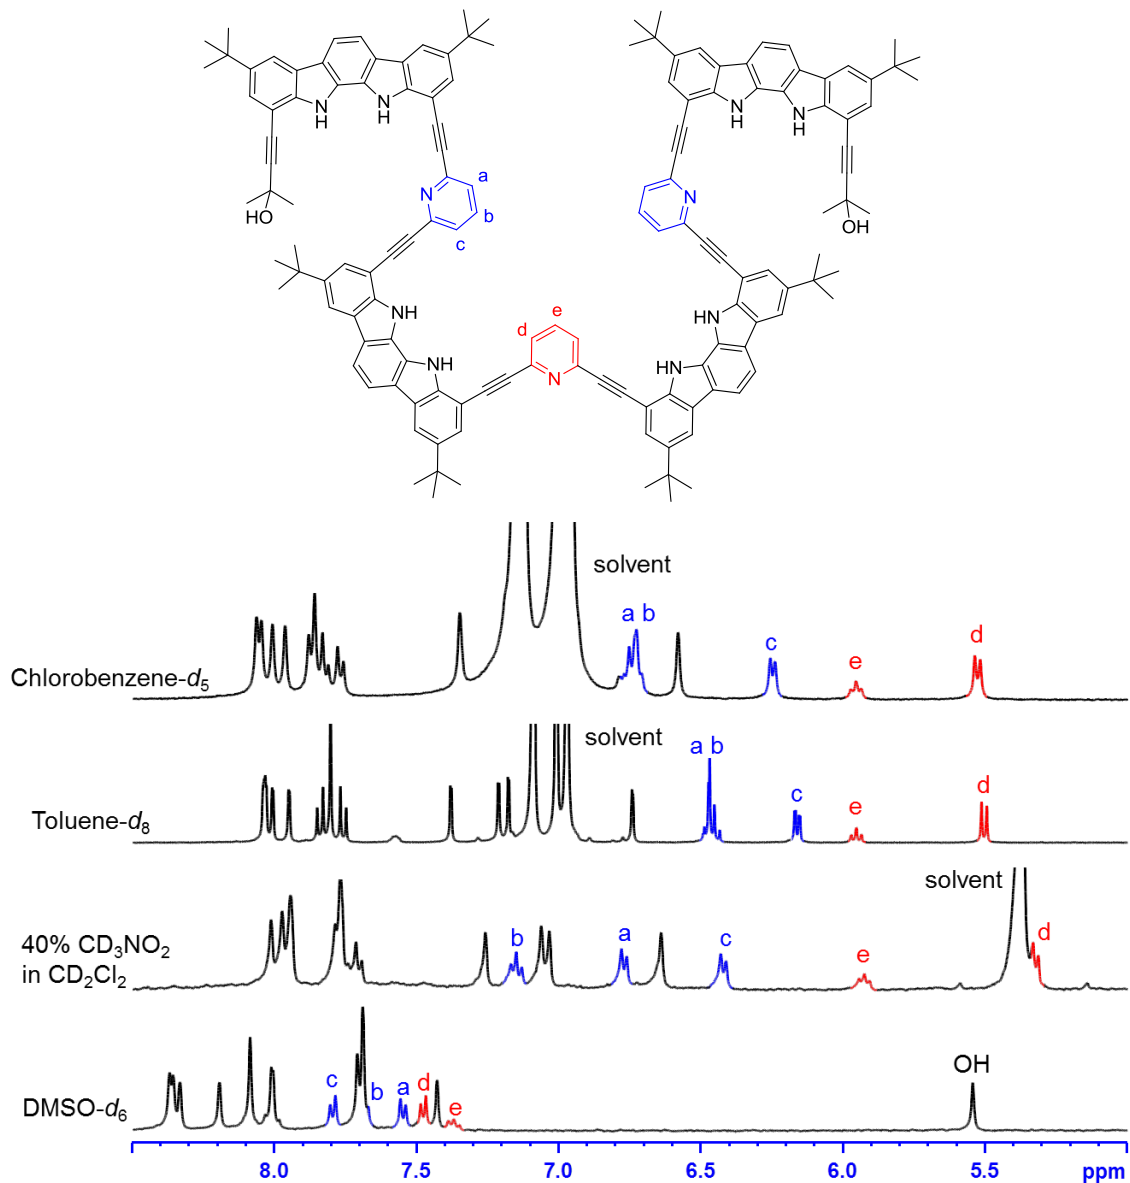

**Fig S1.** Partial  $^1\text{H}$  NMR spectra (25  $^\circ\text{C}$ ) of **1**<sup>[S1]</sup> (1.0~4.0 mM) in DMSO- $d_6$ , water-saturated  $\text{CD}_2\text{Cl}_2$ ,  $\text{CD}_3\text{NO}_2$ /water-saturated  $\text{CD}_2\text{Cl}_2$  (4:6, v/v), water-saturated toluene- $d_8$  and water-saturated chlorobenzene- $d_5$ . The red- and blue-colored peaks correspond to the CH signals of central pyridine and two outer pyridines, respectively.



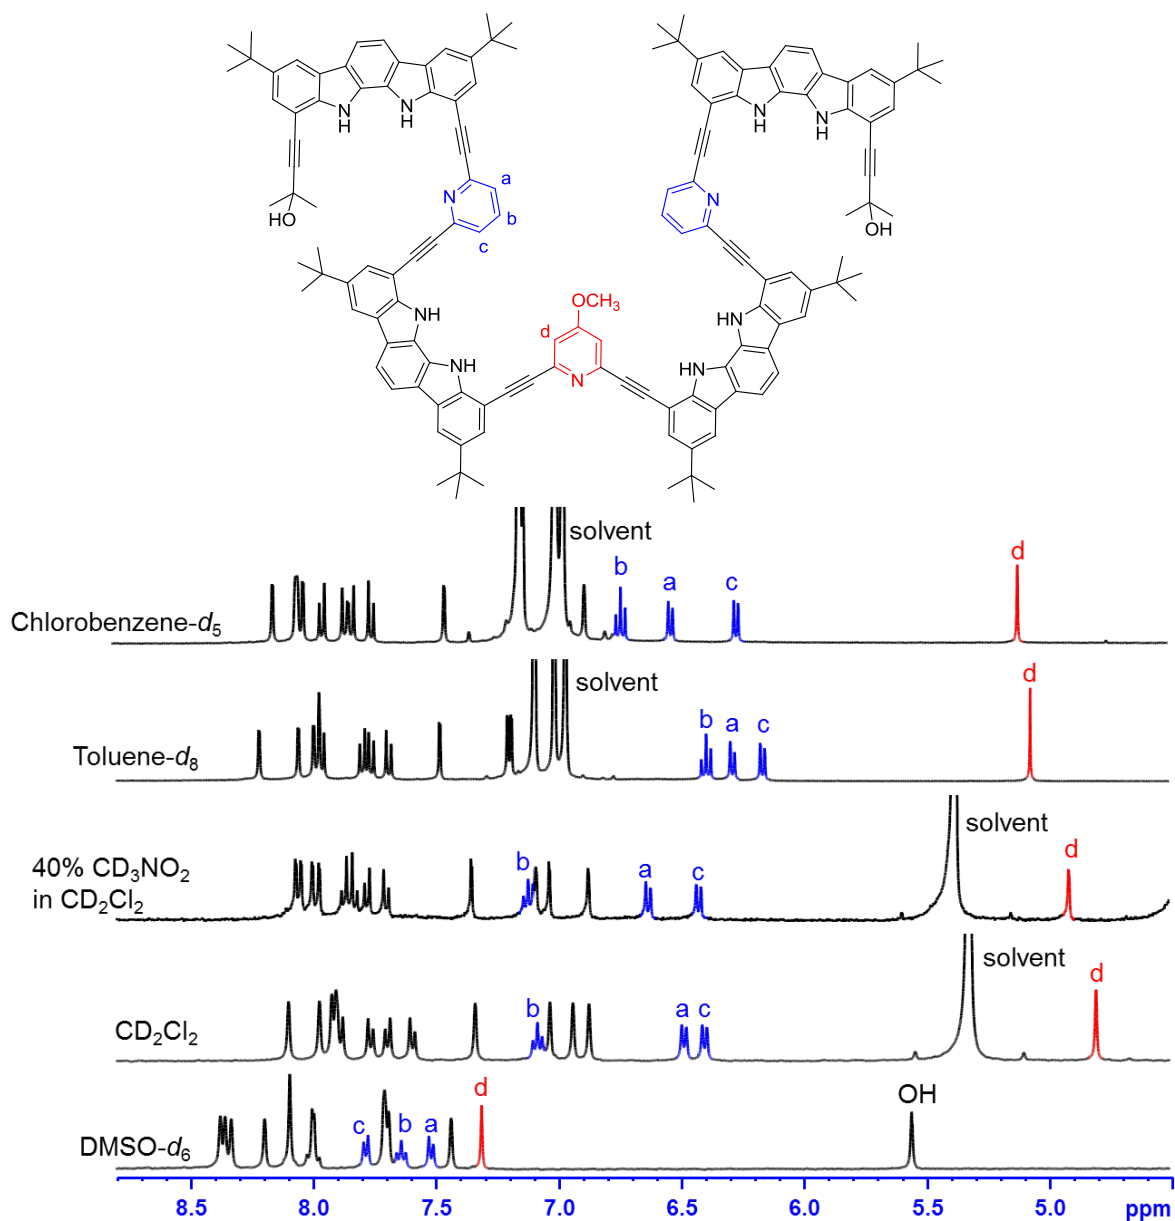

**Fig S2.** Partial  $^1\text{H}$  NMR spectra (25 °C) of **2** (1.0~4.0 mM) in  $\text{DMSO-}d_6$ , water-saturated  $\text{CD}_2\text{Cl}_2$ ,  $\text{CD}_3\text{NO}_2$ /water-saturated  $\text{CD}_2\text{Cl}_2$  (4:6, v/v), water-saturated toluene- $d_8$  and water-saturated chlorobenzene- $d_5$ . The red- and blue-colored peaks correspond to the CH signals of central pyridine and two outer pyridines, respectively.

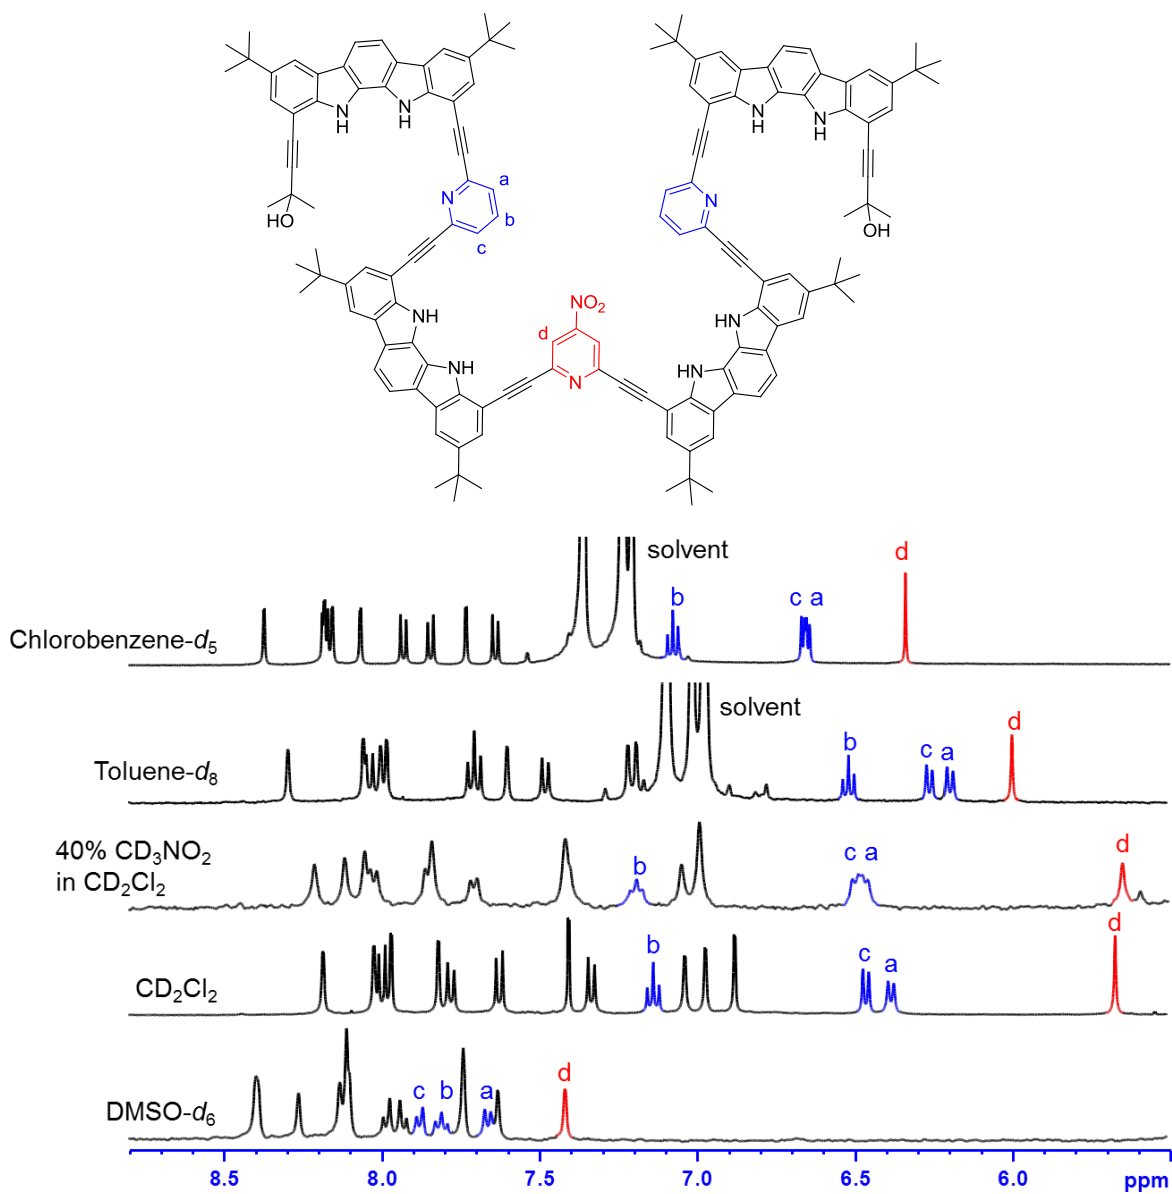

**Fig S3.** Partial <sup>1</sup>H NMR spectra (25 °C) of **3** (1.0~4.0 mM) in DMSO-*d*<sub>6</sub>, water-saturated CD<sub>2</sub>Cl<sub>2</sub>, CD<sub>3</sub>NO<sub>2</sub>/water-saturated CD<sub>2</sub>Cl<sub>2</sub> (4:6, v/v), water-saturated toluene-*d*<sub>8</sub> and water-saturated chlorobenzene-*d*<sub>5</sub>. The red- and blue-colored peaks correspond to the CH signals of central pyridine and two outer pyridines, respectively.

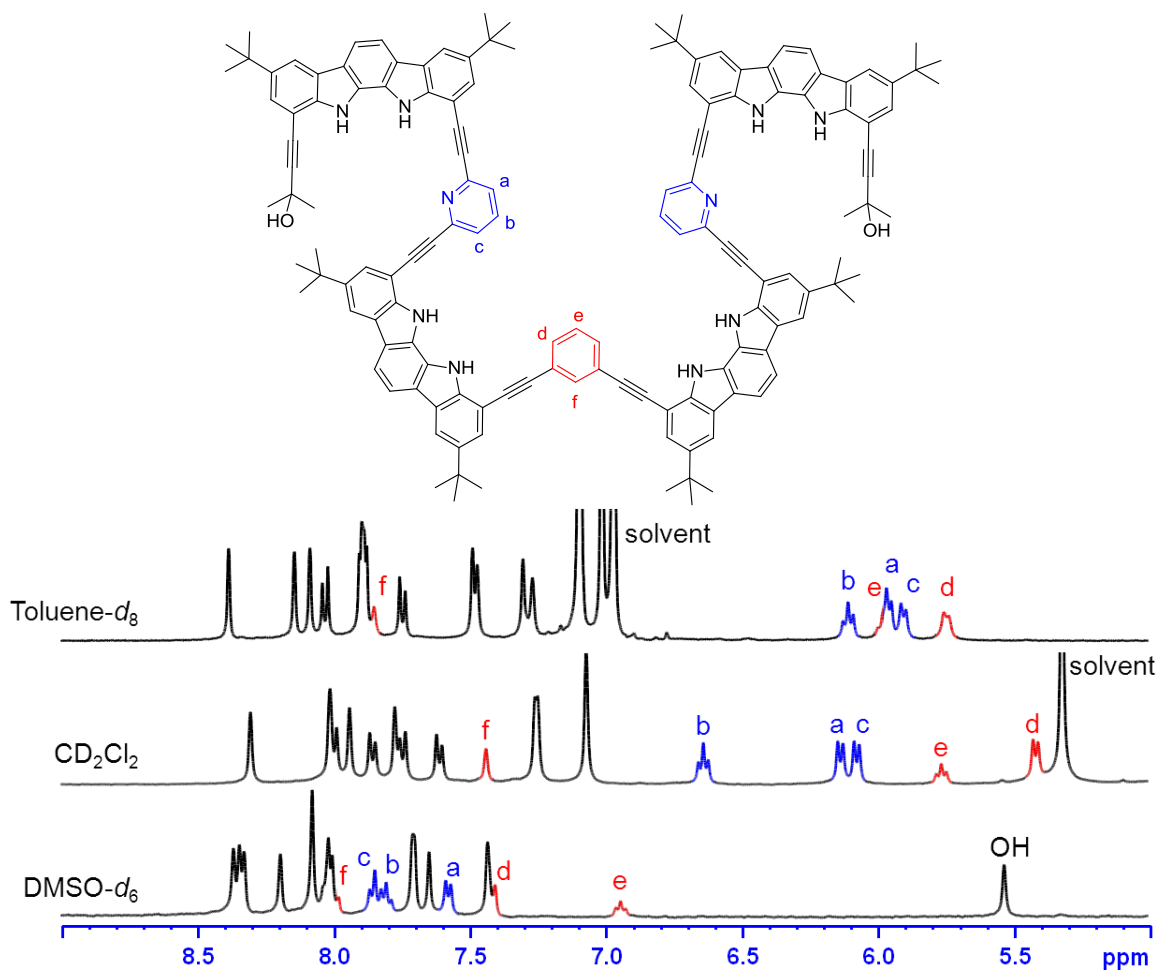

**Fig S4.** Partial  $^1\text{H}$  NMR spectra (25 °C) of **4** (1.0~4.0 mM) in DMSO- $d_6$ , water-saturated  $\text{CD}_2\text{Cl}_2$  and water-saturated toluene- $d_8$ . The red- and blue-colored peaks correspond to the CH signals of central benzene and two outer pyridines, respectively.

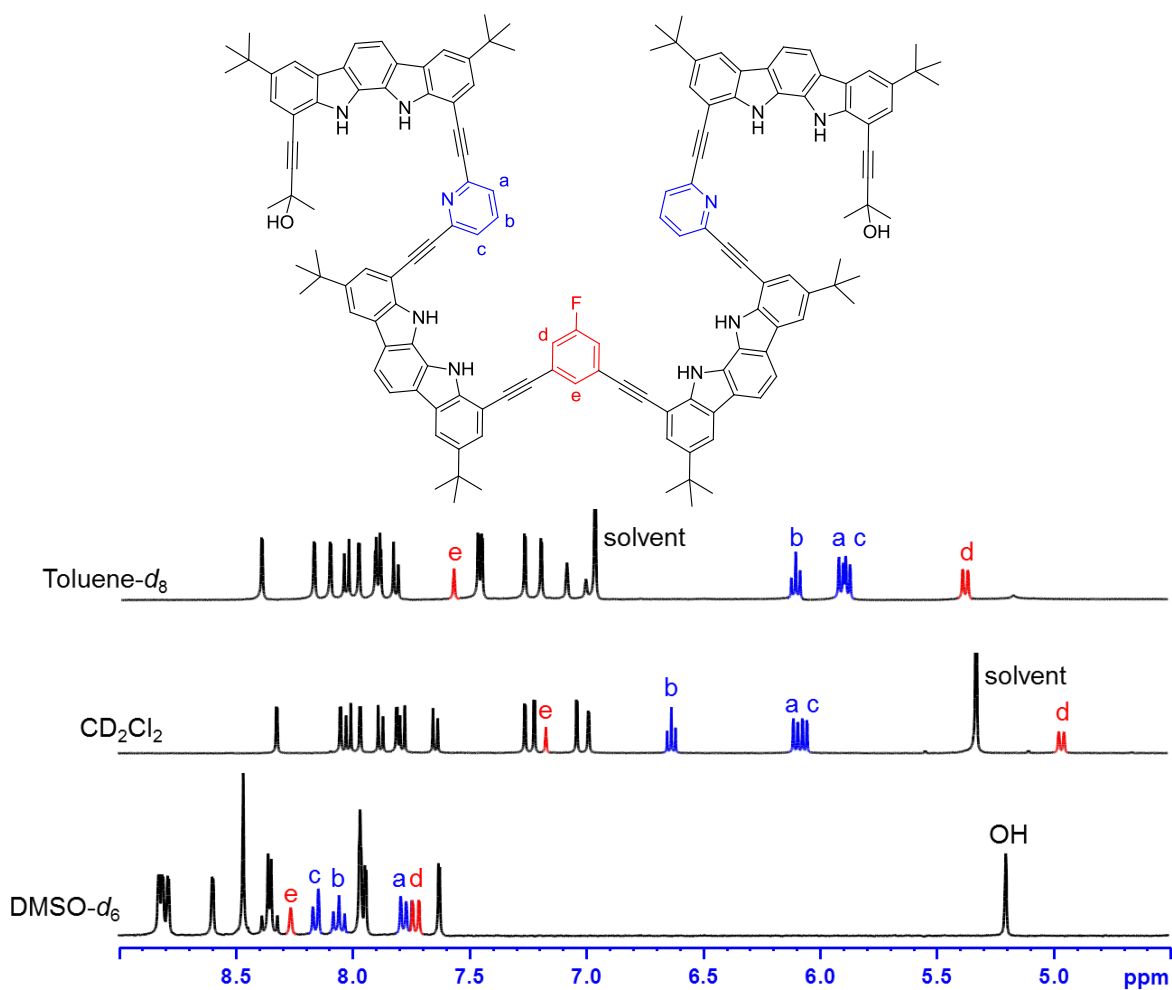

**Fig S5.** Partial  $^1\text{H}$  NMR spectra (25 °C) of **5** (1.0~4.0 mM) in  $\text{DMSO-}d_6$ , water-saturated  $\text{CD}_2\text{Cl}_2$  and water-saturated toluene- $d_8$ . The red- and blue-colored peaks correspond to the CH signals of central benzene and two outer pyridines, respectively.

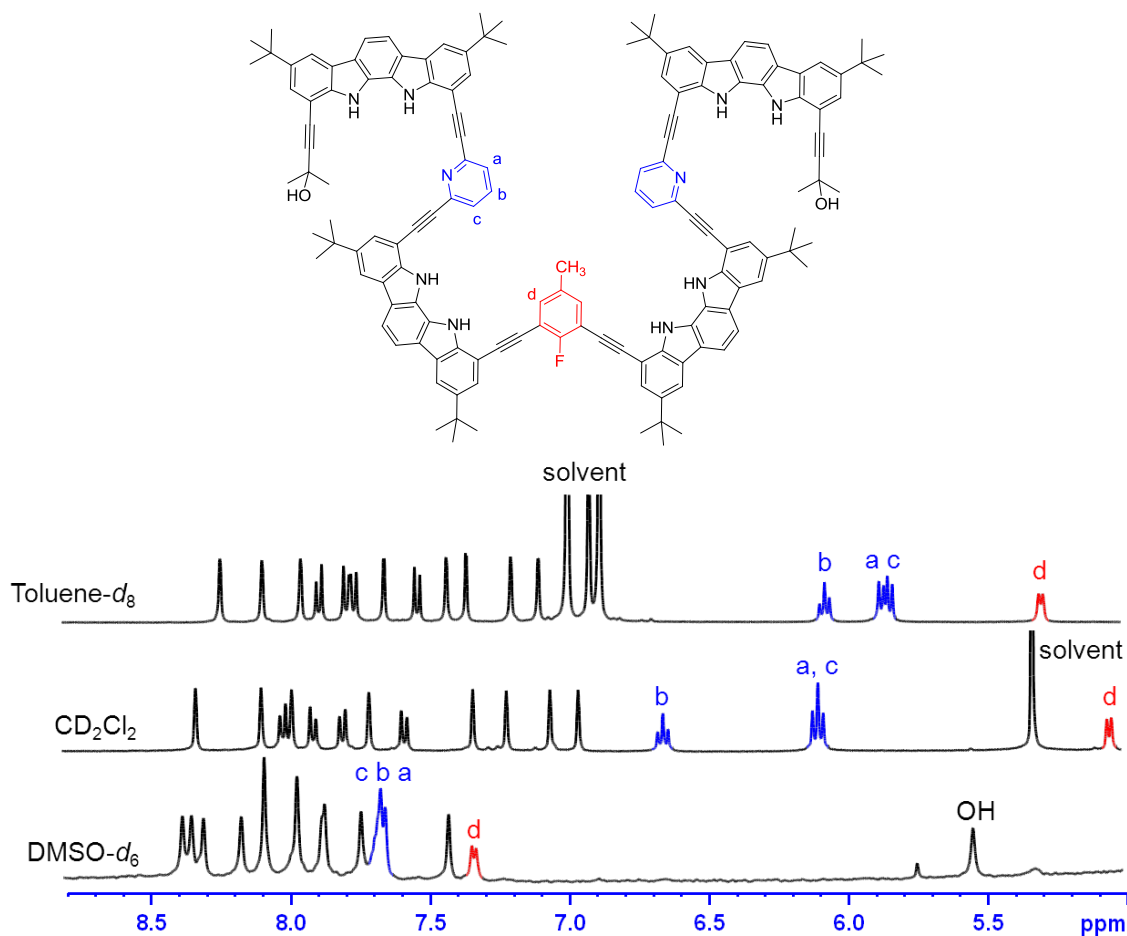

**Fig S6.** Partial  $^1\text{H}$  NMR spectra (25 °C) of **6** (1.0~4.0 mM) in DMSO- $d_6$ , water-saturated  $\text{CD}_2\text{Cl}_2$  and water-saturated toluene- $d_8$ . The red- and blue-colored peaks correspond to the CH signals of central benzene and two outer pyridines, respectively.

**Table S1.**  $^1\text{H}$  NMR chemical shifts (ppm) of **1–6** (1.0~4.0 mM) in DMSO- $d_6$ , water-saturated  $\text{CD}_2\text{Cl}_2$ ,  $\text{CD}_3\text{NO}_2$ /water-saturated  $\text{CD}_2\text{Cl}_2$  (4:6, v/v), water-saturated toluene- $d_8$  and water-saturated chlorobenzene- $d_5$  at 298 K.

|          | $\delta$ (DMSO- $d_6$ )        | $\delta$ ( $\text{CD}_2\text{Cl}_2$ ) | $\delta$ ( $\text{CD}_3\text{NO}_2/\text{CD}_2\text{Cl}_2$<br>4:6) | $\delta$ (toluene- $d_8$ )               | $\delta$ (chlorobenzene- $d_5$ ) |
|----------|--------------------------------|---------------------------------------|--------------------------------------------------------------------|------------------------------------------|----------------------------------|
| <b>1</b> | a<br>7.55<br>(d, $J = 7.7$ Hz) | 6.66<br>(d, $J = 7.7$ Hz)             | 6.77<br>(d, $J = 7.5$ Hz)                                          | 6.49<br>(d, $J = 7.7$ Hz)                | 6.72<br>(d, $J = 7.5$ Hz)        |
|          | b<br>7.69<br>(t, $J = 7.7$ Hz) | 7.07<br>(t, $J = 7.7$ Hz)             | 7.15<br>(t, $J = 7.4$ Hz)                                          | 6.52<br>(t, $J = 7.8$ Hz)                | 6.74<br>(t, $J = 7.8$ Hz)        |
|          | c<br>7.79<br>(d, $J = 7.6$ Hz) | 6.38<br>(d, $J = 7.2$ Hz)             | 6.42<br>(d, $J = 7.5$ Hz)                                          | 6.21<br>(dd, $J = 6.7$ Hz and<br>2.0 Hz) | 6.25<br>(d, $J = 6.6$ Hz)        |

|   |   |                                          |                                          |                           |                           |                           |
|---|---|------------------------------------------|------------------------------------------|---------------------------|---------------------------|---------------------------|
|   | d | 7.48<br>(d, $J = 7.7$ Hz)                | 5.27<br>(d, $J = 7.7$ Hz)                | 5.32<br>(d, $J = 7.7$ Hz) | 5.55<br>(d, $J = 7.6$ Hz) | 5.53<br>(d, $J = 7.6$ Hz) |
|   | e | 7.38<br>(t, $J = 7.6$ Hz)                | 5.93<br>(t, $J = 7.7$ Hz)                | 5.93<br>(t, $J = 7.7$ Hz) | 6.00<br>(t, $J = 7.6$ Hz) | 5.96<br>(t, $J = 8.2$ Hz) |
| 2 | a | 7.51<br>(d, $J = 7.6$ Hz)                | 6.50<br>(d, $J = 7.6$ Hz)                | 6.63<br>(d, $J = 7.5$ Hz) | 6.31<br>(d, $J = 7.0$ Hz) | 6.53<br>(d, $J = 7.6$ Hz) |
|   | b | 7.63<br>(t, $J = 7.8$ Hz)                | 7.07<br>(t, $J = 7.7$ Hz)                | 7.12<br>(t, $J = 7.8$ Hz) | 6.41<br>(t, $J = 7.6$ Hz) | 6.73<br>(t, $J = 7.7$ Hz) |
|   | c | 7.78<br>(d, $J = 7.7$ Hz)                | 6.39<br>(d, $J = 7.6$ Hz)                | 6.42<br>(d, $J = 7.3$ Hz) | 6.15<br>(d, $J = 7.6$ Hz) | 6.26<br>(d, $J = 7.6$ Hz) |
|   | d | 7.31 (s)                                 | 4.84 (s)                                 | 4.91(s)                   | 5.11 (s)                  | 5.11 (s)                  |
| 3 | a | 7.66<br>(d, $J = 7.7$ Hz)                | 6.38<br>(d, $J = 7.6$ Hz)                | 6.47<br>(d, $J = 7.4$ Hz) | 6.19<br>(d, $J = 7.6$ Hz) | 6.32<br>(d, $J = 7.6$ Hz) |
|   | b | 7.80<br>(t, $J = 7.7$ Hz)                | 7.13<br>(t, $J = 7.7$ Hz)                | 7.19<br>(t, $J = 8.2$ Hz) | 6.51<br>(t, $J = 7.8$ Hz) | 6.81<br>(t, $J = 7.6$ Hz) |
|   | c | 7.87<br>(d, $J = 7.8$ Hz)                | 6.46<br>(d, $J = 7.6$ Hz)                | 6.50<br>(d, $J = 7.9$ Hz) | 6.26<br>(d, $J = 7.6$ Hz) | 6.33<br>(d, $J = 7.6$ Hz) |
|   | d | 7.41 (s)                                 | 5.67 (s)                                 | 5.65 (s)                  | 5.99 (s)                  | 5.99 (s)                  |
| 4 | a | 7.57<br>(d, $J = 7.4$ Hz)                | 6.13<br>(d, $J = 7.7$ Hz)                | — <sup>a</sup>            | 5.96<br>(d, $J = 7.3$ Hz) | — <sup>a</sup>            |
|   | b | 7.80<br>(t, $J = 7.8$ Hz)                | 6.64<br>(t, $J = 7.7$ Hz)                | — <sup>a</sup>            | 6.10<br>(t, $J = 7.6$ Hz) | — <sup>a</sup>            |
|   | c | 7.85<br>(d, $J = 7.5$ Hz)                | 6.07<br>(d, $J = 7.7$ Hz)                | — <sup>a</sup>            | 5.90<br>(d, $J = 7.0$ Hz) | — <sup>a</sup>            |
|   | d | 7.41<br>(d, $J = 7.5$ Hz)                | 5.42<br>(d, $J = 7.6$ Hz)                | — <sup>a</sup>            | 5.75<br>(d, $J = 7.2$ Hz) | — <sup>a</sup>            |
|   | e | 6.94<br>(t, $J = 7.4$ Hz)                | 5.76<br>(t, $J = 7.0$ Hz)                | — <sup>a</sup>            | 5.96<br>(t, $J = 7.2$ Hz) | — <sup>a</sup>            |
|   | f | 7.98 (s)                                 | 7.43 (s)                                 | — <sup>a</sup>            | 7.85 (s)                  | — <sup>a</sup>            |
| 5 | a | 7.55<br>(d, $J = 7.6$ Hz)                | 6.10<br>(dd, $J = 7.7$ Hz<br>and 0.8 Hz) | — <sup>a</sup>            | 5.91<br>(d, $J = 7.6$ Hz) | — <sup>a</sup>            |
|   | b | 7.76<br>(t, $J = 7.7$ Hz)                | 6.63<br>(t, $J = 7.7$ Hz)                | — <sup>a</sup>            | 6.11<br>(t, $J = 7.7$ Hz) | — <sup>a</sup>            |
|   | c | 7.84<br>(d, $J = 7.6$ Hz)                | 6.01<br>(dd, $J = 7.7$ Hz<br>and 0.8 Hz) | — <sup>a</sup>            | 5.88<br>(d, $J = 7.6$ Hz) | — <sup>a</sup>            |
|   | d | 7.51<br>(dd, $J = 9.2$ Hz<br>and 1.1 Hz) | 4.95<br>(d, $J = 9.3$ Hz)                | — <sup>a</sup>            | 5.37<br>(d, $J = 9.2$ Hz) | — <sup>a</sup>            |
|   | e | 7.92 (s)                                 | 7.16 (s)                                 | — <sup>a</sup>            | 7.57 (s)                  | — <sup>a</sup>            |
| 6 | a | 7.68<br>(d, $J = 7.4$ Hz)                | 6.13<br>(d, $J = 8.2$ Hz)                | — <sup>a</sup>            | 5.91<br>(d, $J = 7.6$ Hz) | — <sup>a</sup>            |
|   | b | 7.67<br>(t, $J = 7.8$ Hz)                | 6.68<br>(t, $J = 7.9$ Hz)                | — <sup>a</sup>            | 6.12<br>(t, $J = 7.7$ Hz) | — <sup>a</sup>            |
|   | c | 7.65<br>(d, $J = 7.5$ Hz)                | 6.11<br>(d, $J = 8.0$ Hz)                | — <sup>a</sup>            | 5.87<br>(d, $J = 7.7$ Hz) | — <sup>a</sup>            |
|   | d | 7.33<br>(d, $J = 6.6$ Hz)                | 5.08<br>(d, $J = 6.7$ Hz)                | — <sup>a</sup>            | 5.31<br>(d, $J = 6.4$ Hz) | — <sup>a</sup>            |

<sup>a</sup> not measured.

**Table S2.** The chemical shift differences (ppm) of **1–6** (1.0~4.0 mM) in water-saturated CD<sub>2</sub>Cl<sub>2</sub>, CD<sub>3</sub>NO<sub>2</sub>/water-saturated CD<sub>2</sub>Cl<sub>2</sub> (4:6, v/v), water-saturated toluene-*d*<sub>8</sub>, water-saturated chlorobenzene-*d*<sub>5</sub> and DMSO-*d*<sub>6</sub> at 298 K.

|          |   | $\delta$ (DMSO- <i>d</i> <sub>6</sub> ) –<br>$\delta$ (CD <sub>2</sub> Cl <sub>2</sub> ) | $\delta$ (DMSO- <i>d</i> <sub>6</sub> ) –<br>$\delta$ (CD <sub>3</sub> NO <sub>2</sub> /CD <sub>2</sub> Cl <sub>2</sub> 4:6) | $\delta$ (DMSO- <i>d</i> <sub>6</sub> ) –<br>$\delta$ (toluene- <i>d</i> <sub>8</sub> ) | $\delta$ (DMSO- <i>d</i> <sub>6</sub> ) –<br>$\delta$ (chlorobenzene- <i>d</i> <sub>5</sub> ) |
|----------|---|------------------------------------------------------------------------------------------|------------------------------------------------------------------------------------------------------------------------------|-----------------------------------------------------------------------------------------|-----------------------------------------------------------------------------------------------|
| <b>1</b> | a | 0.89                                                                                     | 0.78                                                                                                                         | 1.06                                                                                    | 0.83                                                                                          |
|          | b | 0.62                                                                                     | 0.54                                                                                                                         | 1.17                                                                                    | 0.95                                                                                          |
|          | c | 1.41                                                                                     | 1.37                                                                                                                         | 1.58                                                                                    | 1.54                                                                                          |
|          | d | 2.21                                                                                     | 2.16                                                                                                                         | 1.93                                                                                    | 1.95                                                                                          |
|          | e | 1.45                                                                                     | 1.45                                                                                                                         | 1.38                                                                                    | 1.42                                                                                          |
| <b>2</b> | a | 1.01                                                                                     | 0.88                                                                                                                         | 1.2                                                                                     | 0.98                                                                                          |
|          | b | 0.56                                                                                     | 0.51                                                                                                                         | 1.22                                                                                    | 0.9                                                                                           |
|          | c | 1.39                                                                                     | 1.36                                                                                                                         | 1.63                                                                                    | 1.52                                                                                          |
|          | d | 2.47                                                                                     | 2.4                                                                                                                          | 2.2                                                                                     | 2.2                                                                                           |
| <b>3</b> | a | 1.28                                                                                     | 1.19                                                                                                                         | 1.47                                                                                    | 1.34                                                                                          |
|          | b | 0.67                                                                                     | 0.61                                                                                                                         | 1.29                                                                                    | 0.99                                                                                          |
|          | c | 1.41                                                                                     | 1.37                                                                                                                         | 1.61                                                                                    | 1.54                                                                                          |
|          | d | 1.74                                                                                     | 1.76                                                                                                                         | 1.42                                                                                    | 1.42                                                                                          |
| <b>4</b> | a | 1.44                                                                                     | — <sup>a</sup>                                                                                                               | 1.61                                                                                    | — <sup>a</sup>                                                                                |
|          | b | 1.16                                                                                     | — <sup>a</sup>                                                                                                               | 1.7                                                                                     | — <sup>a</sup>                                                                                |
|          | c | 1.78                                                                                     | — <sup>a</sup>                                                                                                               | 1.95                                                                                    | — <sup>a</sup>                                                                                |
|          | d | 2.15                                                                                     | — <sup>a</sup>                                                                                                               | 1.82                                                                                    | — <sup>a</sup>                                                                                |
|          | e | 1.18                                                                                     | — <sup>a</sup>                                                                                                               | 0.98                                                                                    | — <sup>a</sup>                                                                                |
|          | f | 0.55                                                                                     | — <sup>a</sup>                                                                                                               | 0.13                                                                                    | — <sup>a</sup>                                                                                |
| <b>5</b> | a | 1.45                                                                                     | — <sup>a</sup>                                                                                                               | 1.64                                                                                    | — <sup>a</sup>                                                                                |
|          | b | 1.13                                                                                     | — <sup>a</sup>                                                                                                               | 1.65                                                                                    | — <sup>a</sup>                                                                                |
|          | c | 1.83                                                                                     | — <sup>a</sup>                                                                                                               | 1.96                                                                                    | — <sup>a</sup>                                                                                |
|          | d | 2.56                                                                                     | — <sup>a</sup>                                                                                                               | 2.14                                                                                    | — <sup>a</sup>                                                                                |
|          | e | 0.76                                                                                     | — <sup>a</sup>                                                                                                               | 0.35                                                                                    | — <sup>a</sup>                                                                                |
| <b>6</b> | a | 1.55                                                                                     | — <sup>a</sup>                                                                                                               | 1.77                                                                                    | — <sup>a</sup>                                                                                |
|          | b | 1.12                                                                                     | — <sup>a</sup>                                                                                                               | 1.68                                                                                    | — <sup>a</sup>                                                                                |
|          | c | 1.74                                                                                     | — <sup>a</sup>                                                                                                               | 1.98                                                                                    | — <sup>a</sup>                                                                                |
|          | d | 2.25                                                                                     | — <sup>a</sup>                                                                                                               | 2.02                                                                                    | — <sup>a</sup>                                                                                |

<sup>a</sup> not measured.

## 2.2 Temperature-dependent $^1\text{H}$ NMR spectra

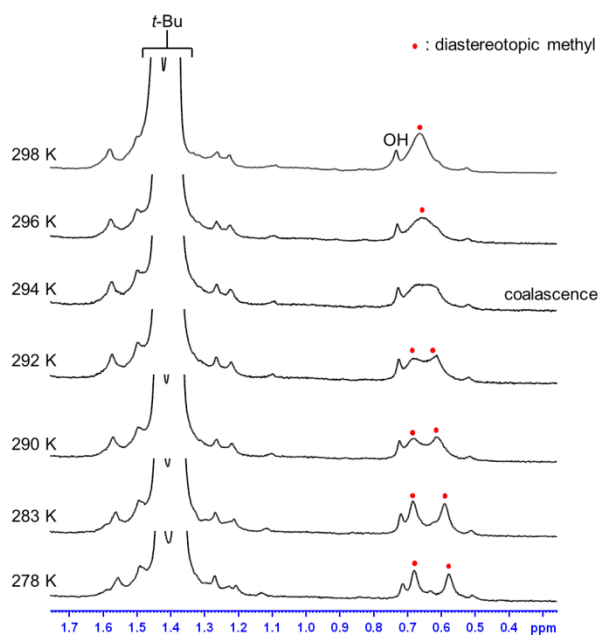

**Fig S7.** Temperature-dependent  $^1\text{H}$  NMR spectra of **1** (1.0 mM) in  $\text{CD}_3\text{NO}_2/\text{water}$ -saturated  $\text{CD}_2\text{Cl}_2$  (4:6, v/v).

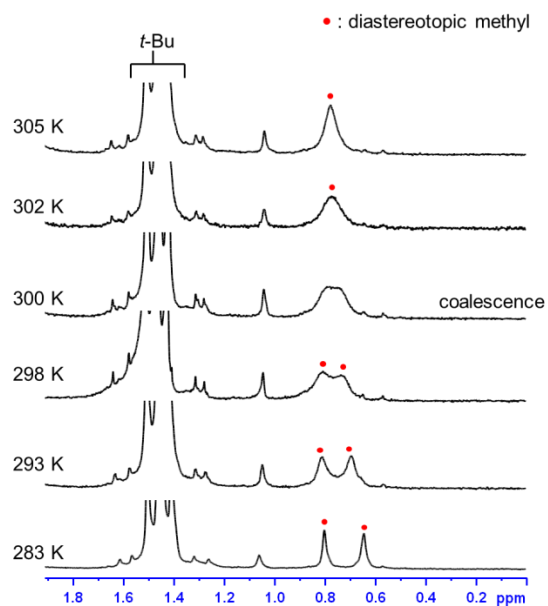

**Fig S8.** Temperature-dependent  $^1\text{H}$  NMR spectra of **2** (1.0 mM) in  $\text{CD}_3\text{NO}_2/\text{water}$ -saturated  $\text{CD}_2\text{Cl}_2$  (4:6, v/v).



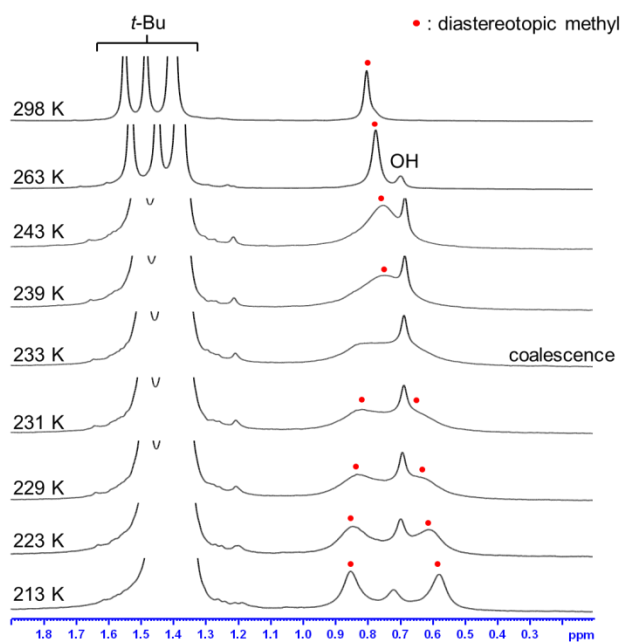

**Fig S9.** Temperature-dependent  $^1\text{H}$  NMR spectra of **4** (4.0 mM) in water-saturated  $\text{CD}_2\text{Cl}_2$ .

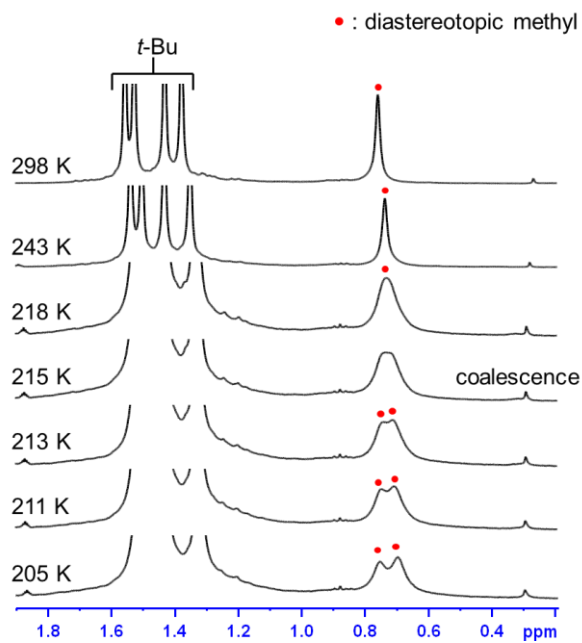

**Fig S10.** Temperature-dependent  $^1\text{H}$  NMR spectra of **4** (4.0 mM) in water-saturated toluene- $d_8$ .

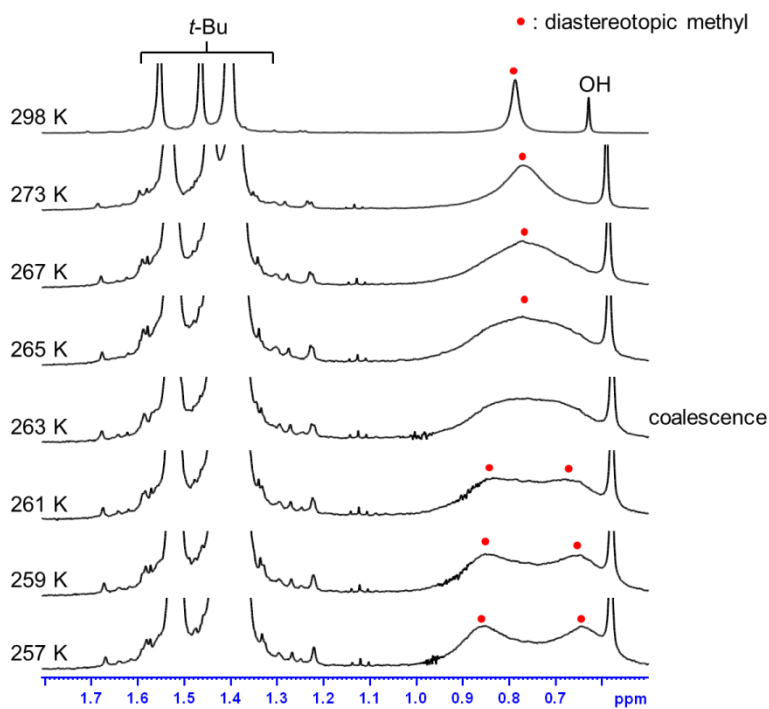

**Fig S11.** Temperature-dependent  $^1\text{H}$  NMR spectra of **5** (4.0 mM) in water-saturated  $\text{CD}_2\text{Cl}_2$ .

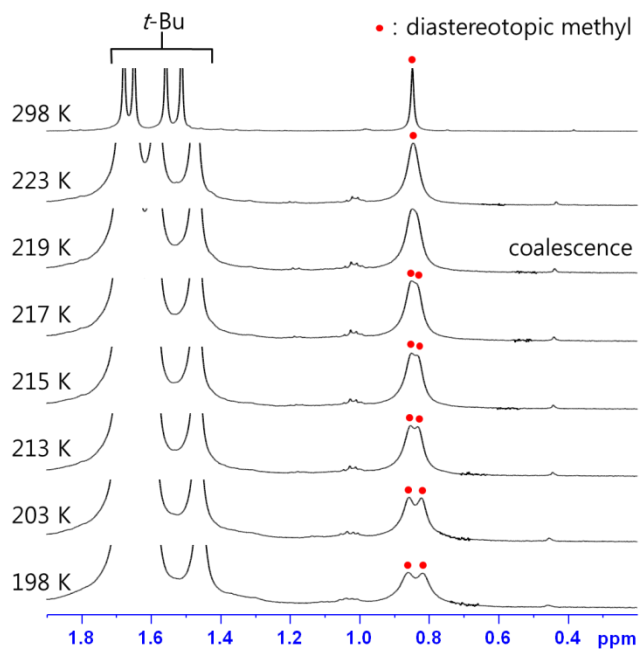

**Fig S12.** Temperature-dependent  $^1\text{H}$  NMR spectra of **5** (4.0 mM) in water-saturated toluene- $d_8$ .

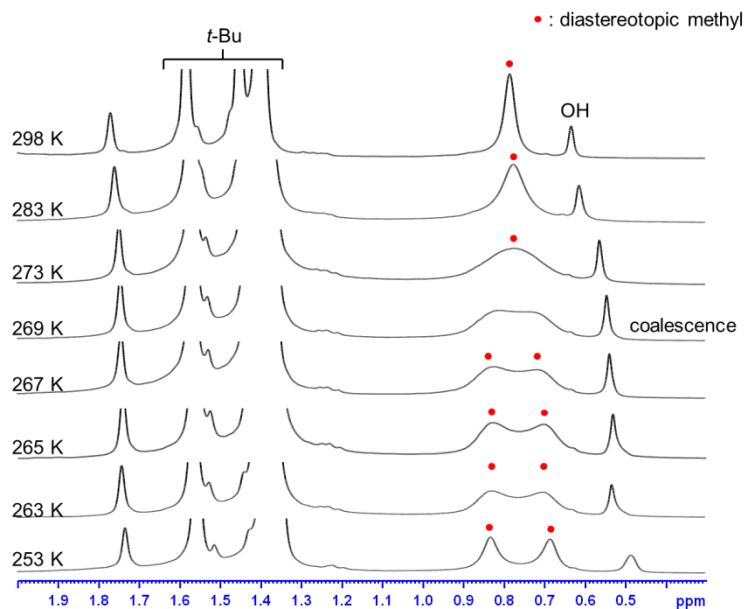

**Fig S13.** Temperature-dependent  $^1\text{H}$  NMR spectra of **6** (4.0 mM) in water-saturated  $\text{CD}_2\text{Cl}_2$ .

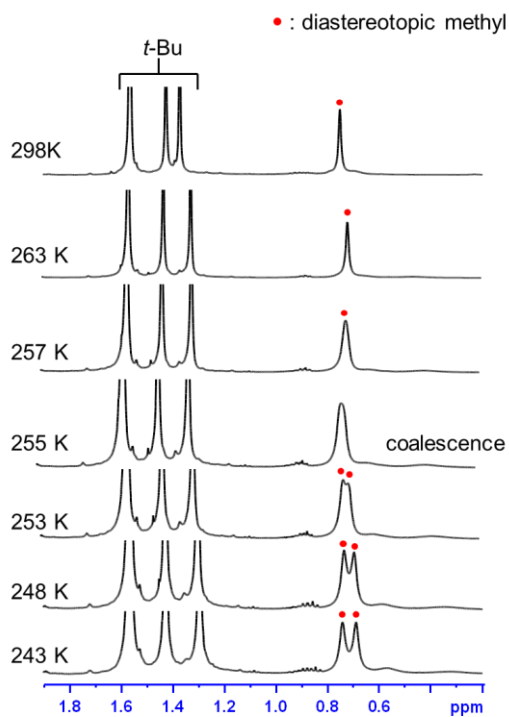

**Fig S14.** Temperature-dependent  $^1\text{H}$  NMR spectra of **6** (4.0 mM) in water-saturated toluene- $d_8$ .

The exchange rate constant ( $k$ ) at the coalescence temperature<sup>[S7]</sup> was calculated employing the equations (1), (2), (6), and (7) shown below where  $\nu_A$  and  $\nu_B$  were the peak frequencies (Hz) of each exchangeable component.

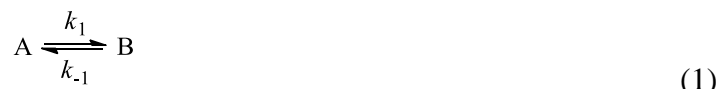

$$k = k_1 + k_{-1} \quad (2)$$

$$k = \frac{\pi\Delta\nu}{\sqrt{2}} \quad (6)$$

$$\Delta\nu = \nu_A - \nu_B \quad (7)$$

### 2.3 2D-EXSY NMR spectra

2D-EXSY NMR studies<sup>[S8]</sup> : Each of compounds **1**, **2** and **3** (4.0 mM) was prepared in a NMR tube and the solution was degassed using the freeze-pump-thaw method under nitrogen. The EXSY spectra of **1**, **2** and **3** were recorded with the phase sensitive NOESY pulse sequence supplied with the Bruker software. TPPI was used to obtain quadrature detection in F1. Each of the 128 F1 increments was the accumulation of 2–16 scans.

---

<sup>[S7]</sup> H. Friebolin, *Basic One- and Two-Dimensional NMR Spectroscopy*, VCH, Weinheim, 1991, pp. 269-273.

<sup>[S8]</sup> (a) C. L. Perrin and T. J. Dwyer, *Chem. Rev.*, 1990, **90**, 935; (b) S.-Y. Chang, J. S. Choi and K.-S. Jeong, *Chem. Eur. J.*, 2001, **7**, 2687; (c) Q. Gan, Y. Ferrand, D. Bao, B. Kauffman, A. Grélard, H. Jiang and I. Huc, *Science*, 2011, **331**, 1172; (d) Y. Ferrand, N. Chandramouli, A. M. Kendhale, C. Aube. B. Kauffmann, A. Grélard, M. Laguerre, D. Dubreuil and I. Huc, *J. Am. Chem. Soc.*, 2012, **134**, 11282.

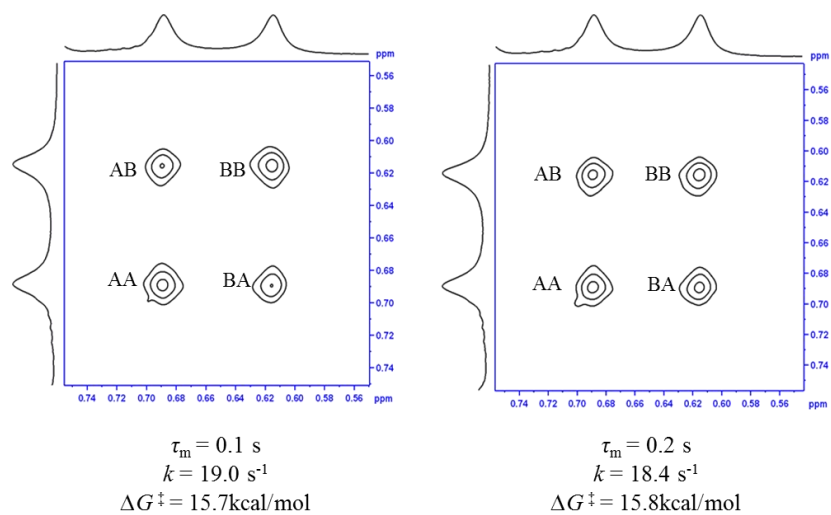

**Fig S15.** EXSY spectra (water-saturated toluene- $d_8$ , 25 °C) of **1** (4.0 mM). The exchange rate constant ( $k$ ) and free energy barrier ( $\Delta G^\ddagger$ ) were determined with two different mixing times ( $\tau_m$ ).

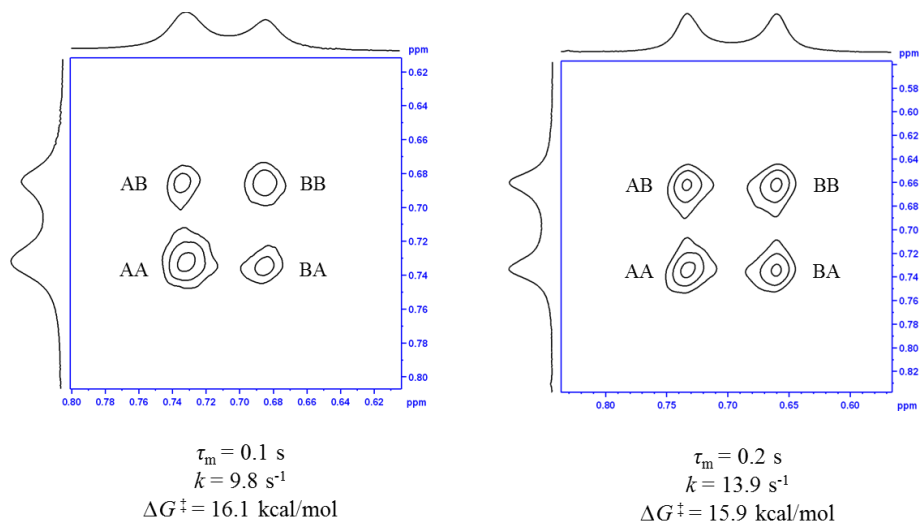

**Fig S16.** EXSY spectra (water-saturated chlorobenzene- $d_5$ , 25 °C) of **1** (4.0 mM). The exchange rate constant ( $k$ ) and free energy barrier ( $\Delta G^\ddagger$ ) were determined with two different mixing times ( $\tau_m$ ).

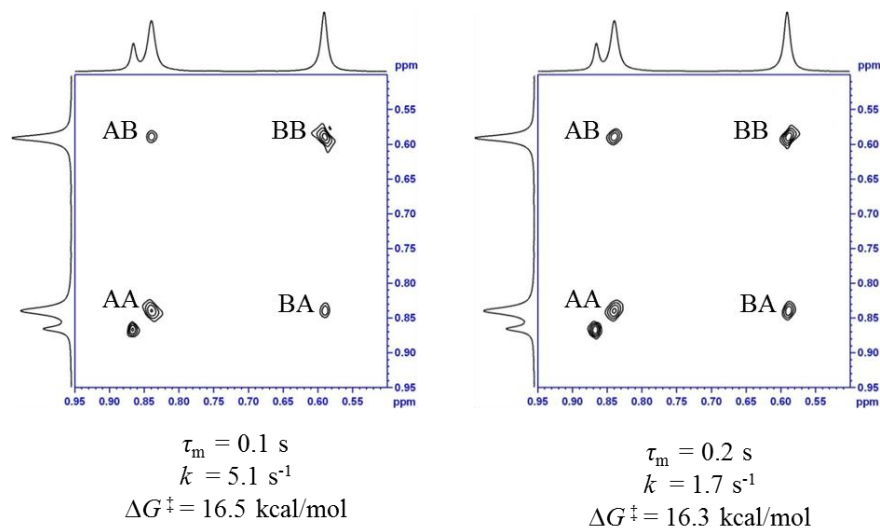

**Fig S17.** EXSY spectra (water-saturated  $\text{CD}_2\text{Cl}_2$ , 25 °C) of **2** (4.0 mM). The exchange rate constant ( $k$ ) and free energy barrier ( $\Delta G^\ddagger$ ) were determined with two different mixing times ( $\tau_m$ ).

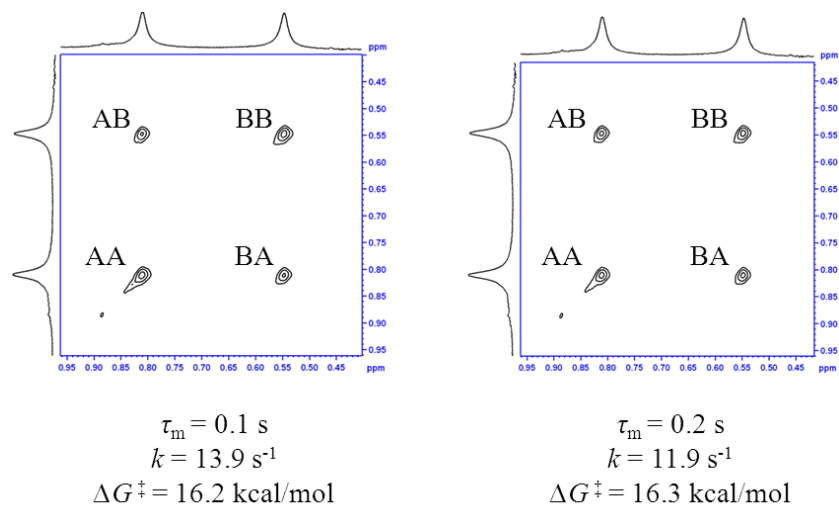

**Fig S18.** EXSY spectra (water-saturated  $\text{CD}_2\text{Cl}_2$ , 30 °C) of **2** (4.0 mM). The exchange rate constant ( $k$ ) and free energy barrier ( $\Delta G^\ddagger$ ) were determined with two different mixing times ( $\tau_m$ ).

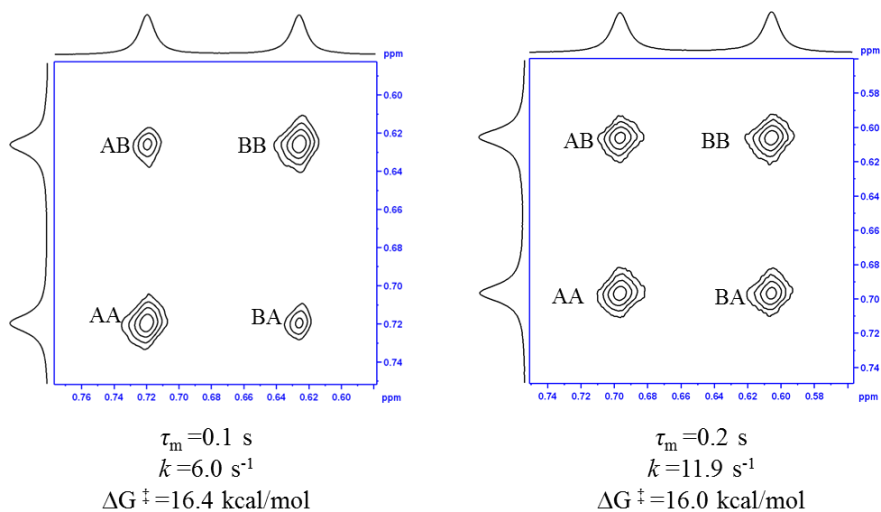

**Fig S19.** EXSY spectra (water-saturated toluene- $d_8$ , 25 °C) of **2** (4.0 mM). The exchange rate constant ( $k$ ) and free energy barrier ( $\Delta G^\ddagger$ ) were determined with two different mixing times ( $\tau_m$ ).

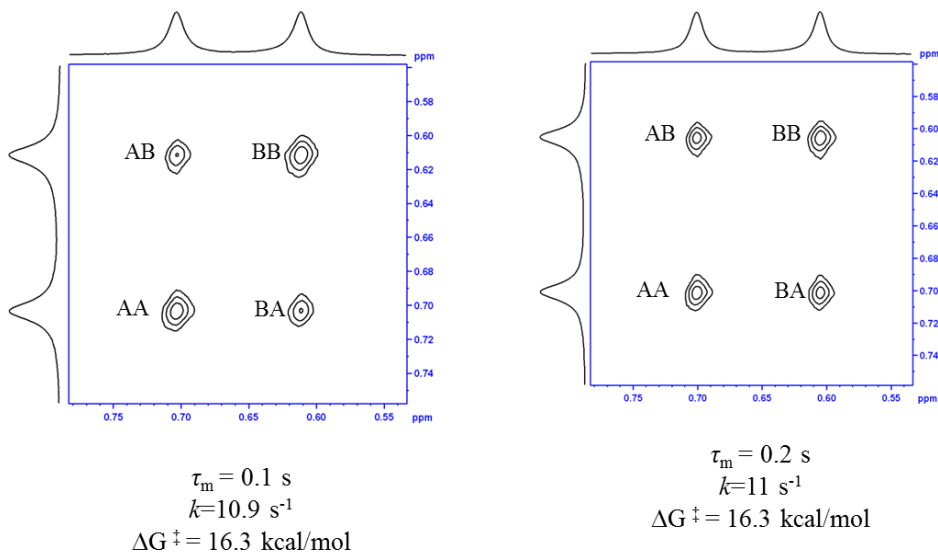

**Fig S20.** EXSY spectra (water-saturated toluene- $d_8$ , 30 °C) of **2** (4.0 mM). The exchange rate constant ( $k$ ) and free energy barrier ( $\Delta G^\ddagger$ ) were determined with two different mixing times ( $\tau_m$ ).

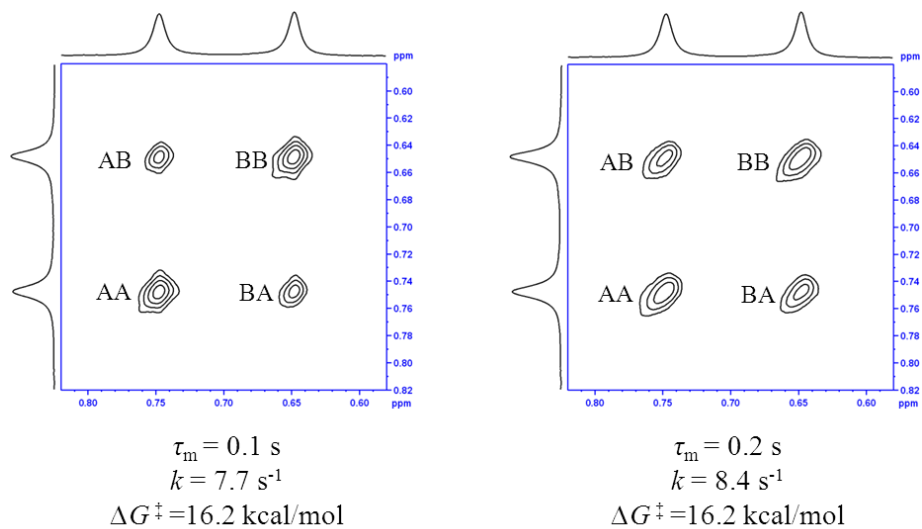

**Fig S21.** EXSY spectra (water-saturated chlorobenzene- $d_5$ , 25 °C) of **2** (4.0 mM). The exchange rate constant ( $k$ ) and free energy barrier ( $\Delta G^\ddagger$ ) were determined with two different mixing times ( $\tau_m$ ).

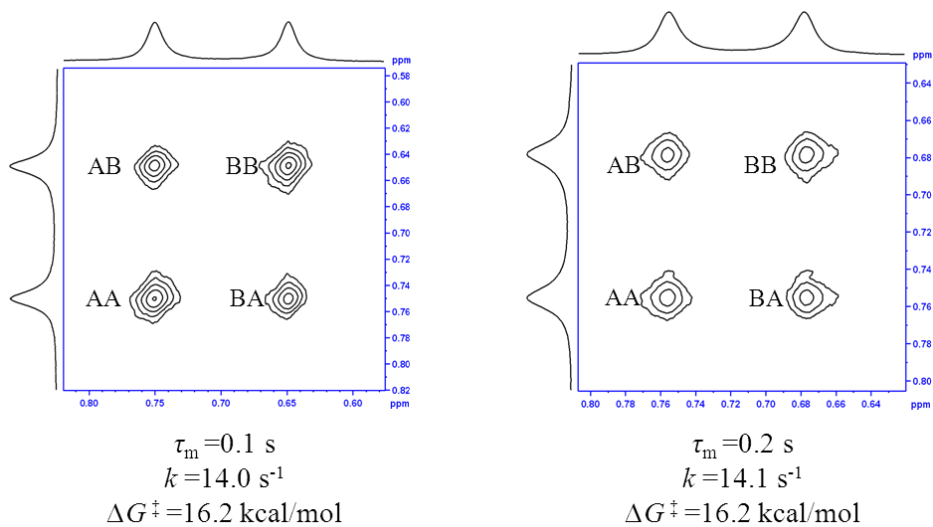

**Fig S22.** EXSY spectra (water-saturated chlorobenzene- $d_5$ , 30 °C) of **2** (4.0 mM). The exchange rate constant ( $k$ ) and free energy barrier ( $\Delta G^\ddagger$ ) were determined with two different mixing times ( $\tau_m$ ).



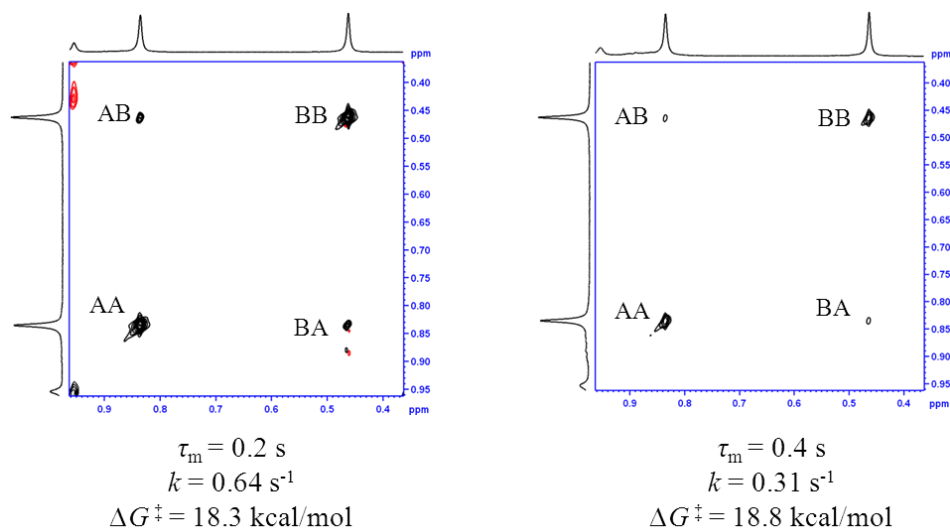

**Fig S23.** EXSY spectra (water-saturated  $\text{CD}_2\text{Cl}_2$ , 35 °C) of **3** (4.0 mM). The exchange rate constant ( $k$ ) and free energy barrier ( $\Delta G^\ddagger$ ) were determined with two different mixing times ( $\tau_m$ ).

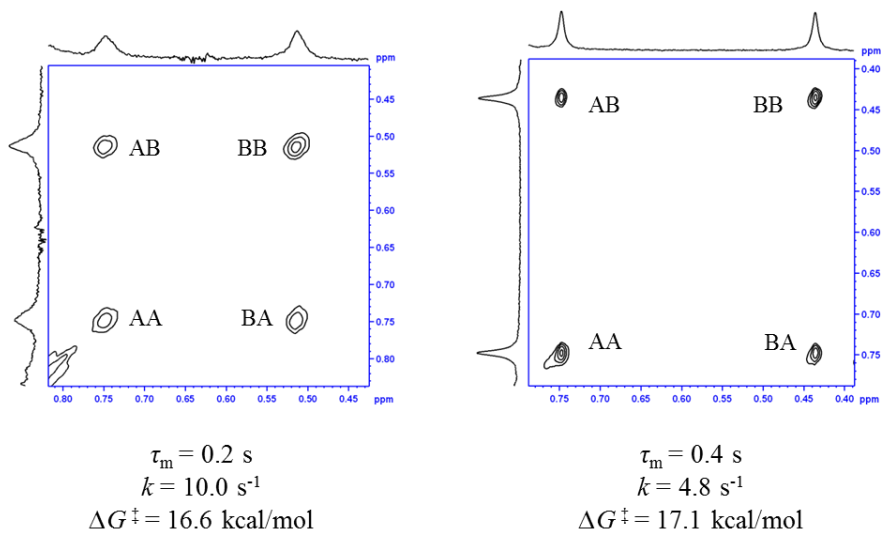

**Fig S24.** EXSY spectra (40%  $\text{CD}_3\text{NO}_2$  in water-saturated  $\text{CD}_2\text{Cl}_2$ , 35 °C) of **3** (4.0 mM). The exchange rate constant ( $k$ ) and free energy barrier ( $\Delta G^\ddagger$ ) were determined with two different mixing times ( $\tau_m$ ).

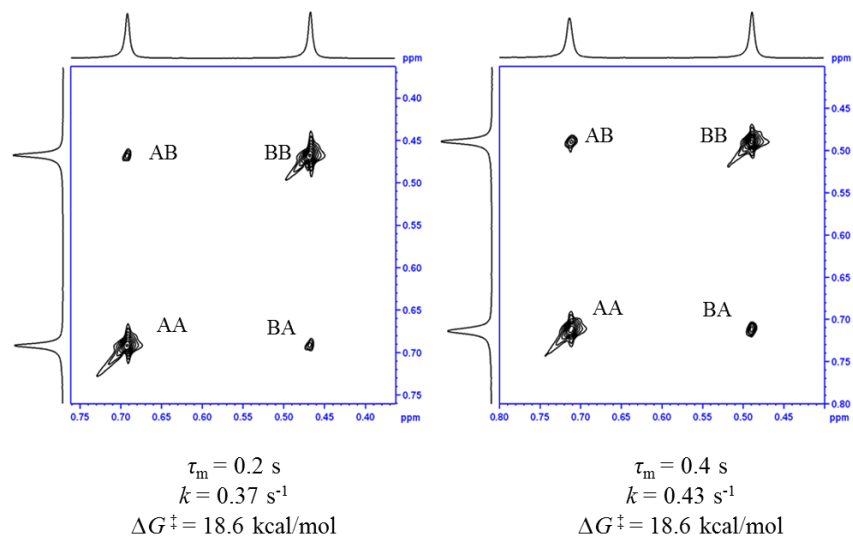

**Fig S25.** EXSY spectra (water-saturated toluene- $d_8$ , 35 °C) of **3** (4.0 mM). The exchange rate constant ( $k$ ) and free energy barrier ( $\Delta G^\ddagger$ ) were determined with two different mixing times ( $\tau_m$ ).

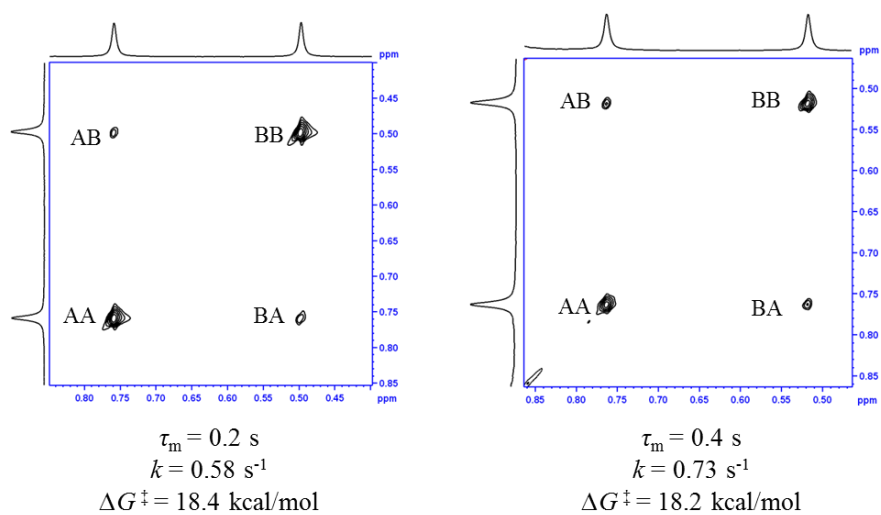

**Fig S26.** EXSY spectra (water-saturated chlorobenzene- $d_5$ , 35 °C) of **3** (4.0 mM). The exchange rate constant ( $k$ ) and free energy barrier ( $\Delta G^\ddagger$ ) were determined with two different mixing times ( $\tau_m$ ).

Exchange rate constants ( $k$ ) and free energy barriers ( $\Delta G^\ddagger$ ) were calculated employing equations (1)–(5) shown below, where  $I_{AB}$  and  $I_{BA}$  were cross peak volumes, and  $I_{AA}$  and  $I_{BB}$  were diagonal peak volumes.

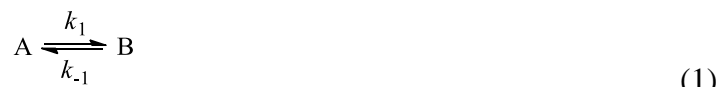

$$k = k_1 + k_{-1} \quad (2)$$

$$k = \frac{1}{\tau_m} \times \ln \frac{r+1}{r-1} \quad (3)$$

$$r = \frac{I_{AA}+I_{BB}}{I_{AB}+I_{BA}} \quad (4)$$

$$\Delta G^\ddagger = -RT \ln \frac{kh}{k_B T} \quad (5)$$

$$(R = 1.9872 \text{ cal} \cdot \text{K}^{-1} \cdot \text{mol}^{-1}, k_B = 3.2995 \times 10^{-24} \text{ cal} \cdot \text{K}^{-1}, h = 1.5836 \times 10^{-34} \text{ cal} \cdot \text{s})$$

#### 2.4 Activation free energies ( $\Delta G^\ddagger$ )

**Table S3.** Activation free energies (kcal/mol)<sup>a</sup> for inter-conversion of *P* and *M* helices in four different media<sup>b</sup>

| Method               | CD <sub>2</sub> Cl <sub>2</sub> |                     | 40% CD <sub>3</sub> NO <sub>2</sub> in CD <sub>2</sub> Cl <sub>2</sub> <sup>c</sup> |                     | Toluene- <i>d</i> <sub>8</sub> |                     | Chlorobenzene- <i>d</i> <sub>5</sub> |                     |
|----------------------|---------------------------------|---------------------|-------------------------------------------------------------------------------------|---------------------|--------------------------------|---------------------|--------------------------------------|---------------------|
|                      | T (°C)                          | $\Delta G^\ddagger$ | T (°C)                                                                              | $\Delta G^\ddagger$ | T (°C)                         | $\Delta G^\ddagger$ | T (°C)                               | $\Delta G^\ddagger$ |
| <b>1</b> EXSY        | 25                              | 15.6 ± 0.2          | — <sup>d</sup>                                                                      | — <sup>d</sup>      | 25                             | 15.8 ± 0.1          | 25                                   | 16.0 ± 0.1          |
| Coalescence          | — <sup>d</sup>                  | — <sup>d</sup>      | 21                                                                                  | 14.7                | — <sup>d</sup>                 | — <sup>d</sup>      | — <sup>d</sup>                       | — <sup>d</sup>      |
| <b>2</b> EXSY        | 25                              | 16.4 ± 0.1          | — <sup>d</sup>                                                                      | — <sup>d</sup>      | 25                             | 16.2 ± 0.2          | 25                                   | 16.2 ± 0.1          |
| EXSY                 | 30                              | 16.2 ± 0.1          | — <sup>d</sup>                                                                      | — <sup>d</sup>      | 30                             | 16.3 ± 0.1          | 30                                   | 16.2 ± 0.1          |
| Coalescence          | — <sup>d</sup>                  | — <sup>d</sup>      | 27                                                                                  | 14.6                | — <sup>d</sup>                 | — <sup>d</sup>      | — <sup>d</sup>                       | — <sup>d</sup>      |
| <b>3</b> EXSY        | 35                              | 18.5 ± 0.2          | 35                                                                                  | 17.0 ± 0.3          | 35                             | 18.6 ± 0.1          | 35                                   | 18.3 ± 0.1          |
| <b>4</b> Coalescence | −40                             | 11.0                | — <sup>d</sup>                                                                      | — <sup>d</sup>      | −58                            | 10.8                | — <sup>d</sup>                       | — <sup>d</sup>      |
| <b>5</b> Coalescence | −10                             | 12.4                | — <sup>d</sup>                                                                      | — <sup>d</sup>      | −54                            | 11.1                | — <sup>d</sup>                       | — <sup>d</sup>      |
| <b>6</b> Coalescence | −4                              | 13.1                | — <sup>d</sup>                                                                      | — <sup>d</sup>      | −18                            | 12.9                | — <sup>d</sup>                       | — <sup>d</sup>      |

<sup>a</sup> 2D-EXSY experiments were all at least duplicated using different mixing times (100 and 200 ms).

<sup>b</sup> Water-saturated deuterated solvents were used. <sup>c</sup> Prepared by mixing 40% (v/v) CD<sub>3</sub>NO<sub>2</sub> in water-saturated CD<sub>2</sub>Cl<sub>2</sub>. <sup>d</sup> Not determined.

### 3. Computer modeling

Energy-minimized structures were generated using MacroModeling 9.1<sup>[S9]</sup> program with MMFFs force field<sup>[S10]</sup> in the chloroform solvent. Higher energy structures were generated by dihedral driving calculation.

**Table S4.** Relative conformational energies (kJ/mol) of indolocarbazole-arylethyne

| Conformation                                                                        | Aryl ring        |                   |                   |
|-------------------------------------------------------------------------------------|------------------|-------------------|-------------------|
|                                                                                     | A (syn-coplanar) | B (perpendicular) | C (anti-coplanar) |
|    | 0 (most stable)  | + 4.3             | + 7.1             |
|   | 0 (most stable)  | + 4.3             | + 6.4             |
|  | 0 (most stable)  | + 4.7             | + 6.8             |
|  | + 1.5            | 0 (most stable)   | + 1.8             |
|  | + 1.4            | 0 (most stable)   | + 1.5             |
|  | 0 (most stable)  | + 3.2             | + 5.0             |

<sup>[S9]</sup> (a) F. Mohamadi, N. G. J. Richards, W. C. Guida, R. Liskamp, M. Lipton, C. Caufield, G. Chang, T. Hendrickson and W. C. Still, *J. Comput. Chem.*, 1990, **11**, 440; (b) MacroModel, version 9.1, Schrödinger, LLC, New York, NY, 2005.

<sup>[S10]</sup> T. A. Halgren, *J. Comput. Chem.*, 1996, **17**, 490.
